# Supplementary material for: Polyphenol Profiling of Chestnut Pericarp, Integument and Curing Water Extracts to Qualify These Food By-Products as a Source of Antioxidants
Source: MDPI journal article supplement (doi:10.3390/molecules26082335), 2021-04-17

**Polyphenol profiling of chestnut pericarp, integument and curing water  
extracts to qualify these food by-products as a source of antioxidants**

**Supplementary Materials**

## Supplementary Materials

Figure 1 - pH profile of medium during the water curing with different treatments

A) tap water containing *L. pentosus*

B) tap water

C) recycled wastewater from a previous curing treatment with tap water

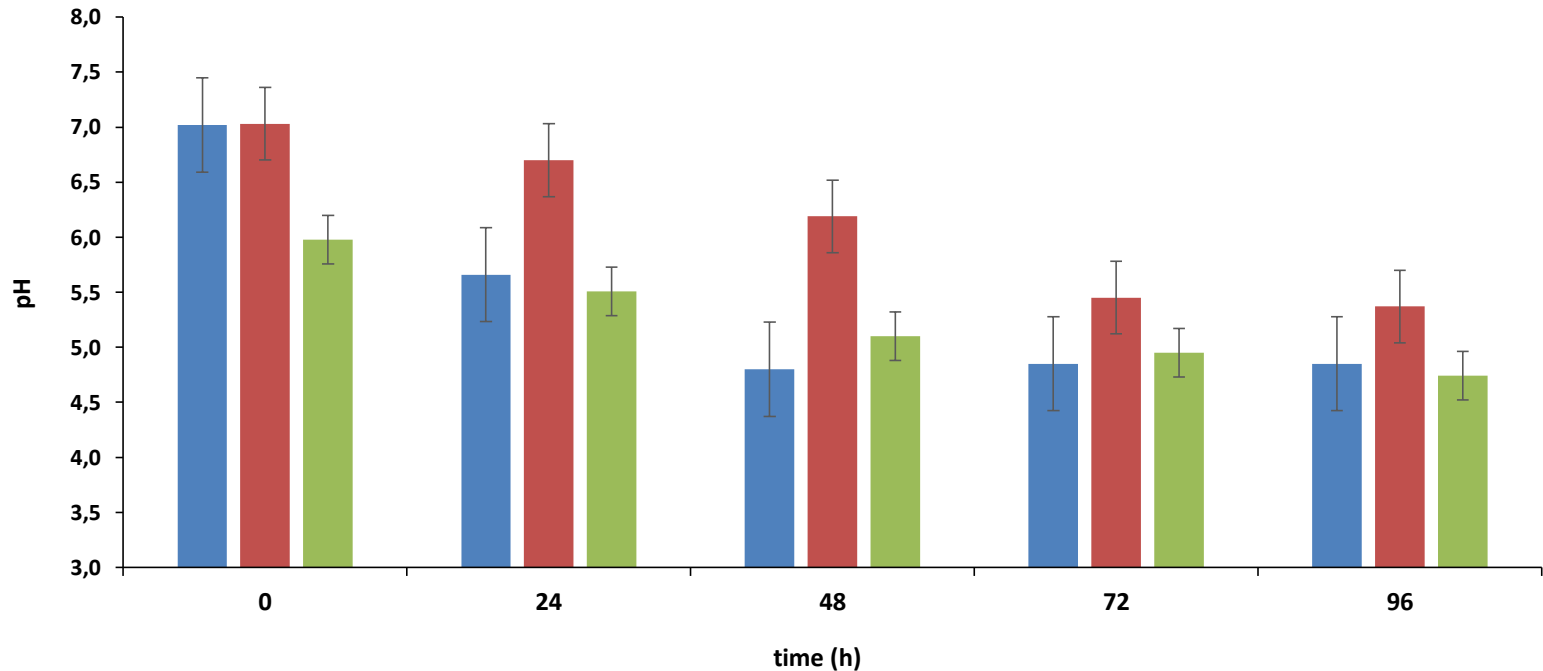

# Supplementary Materials

## Figure 2 - MS/MS spectrum at $m/z$ 579 acquired in positive ion mode

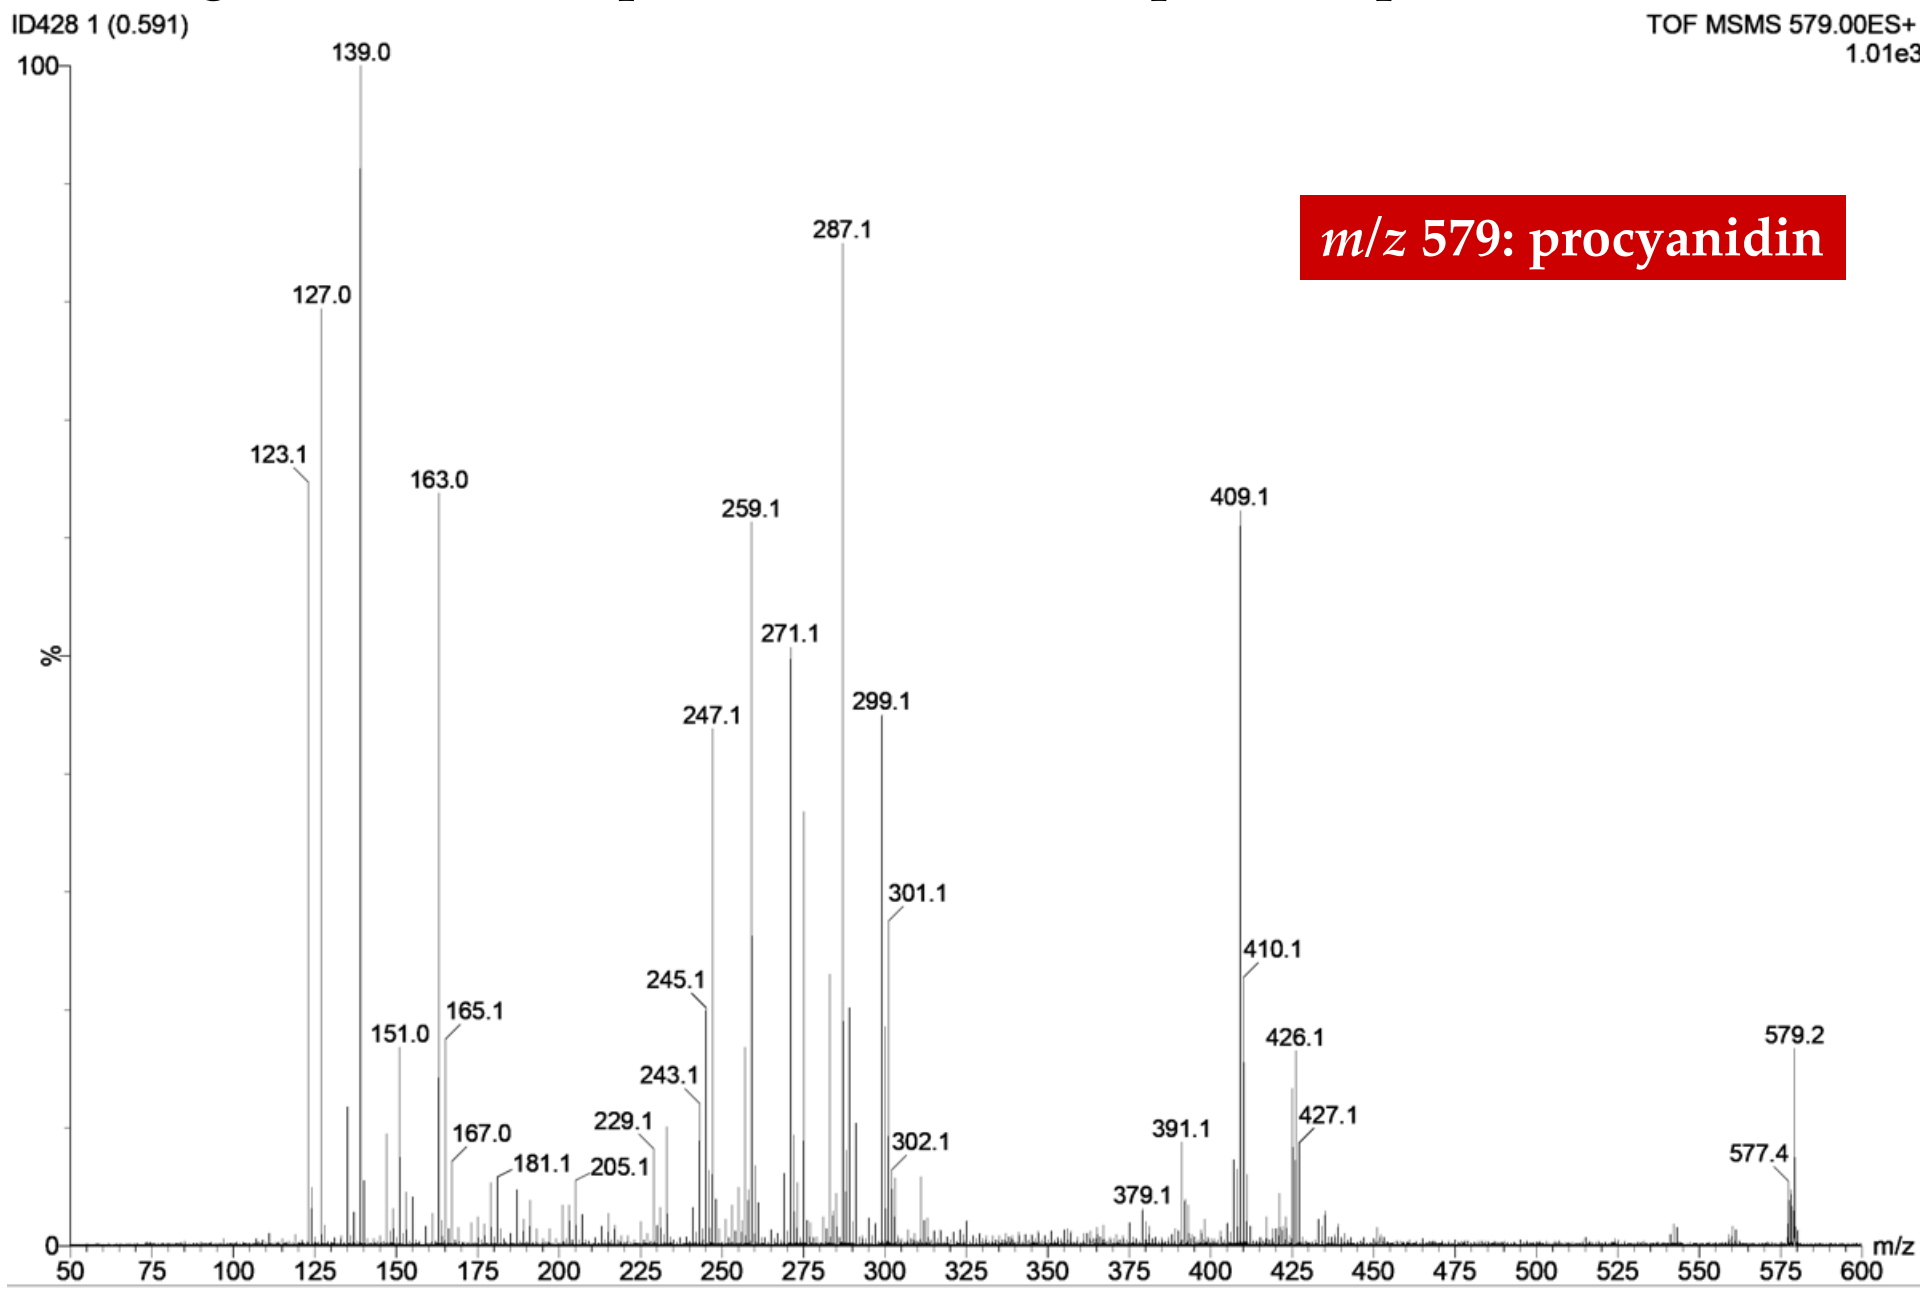

# Supplementary Materials

Figure 3 - MS/MS spectrum at  $m/z$  595 acquired in positive ion mode

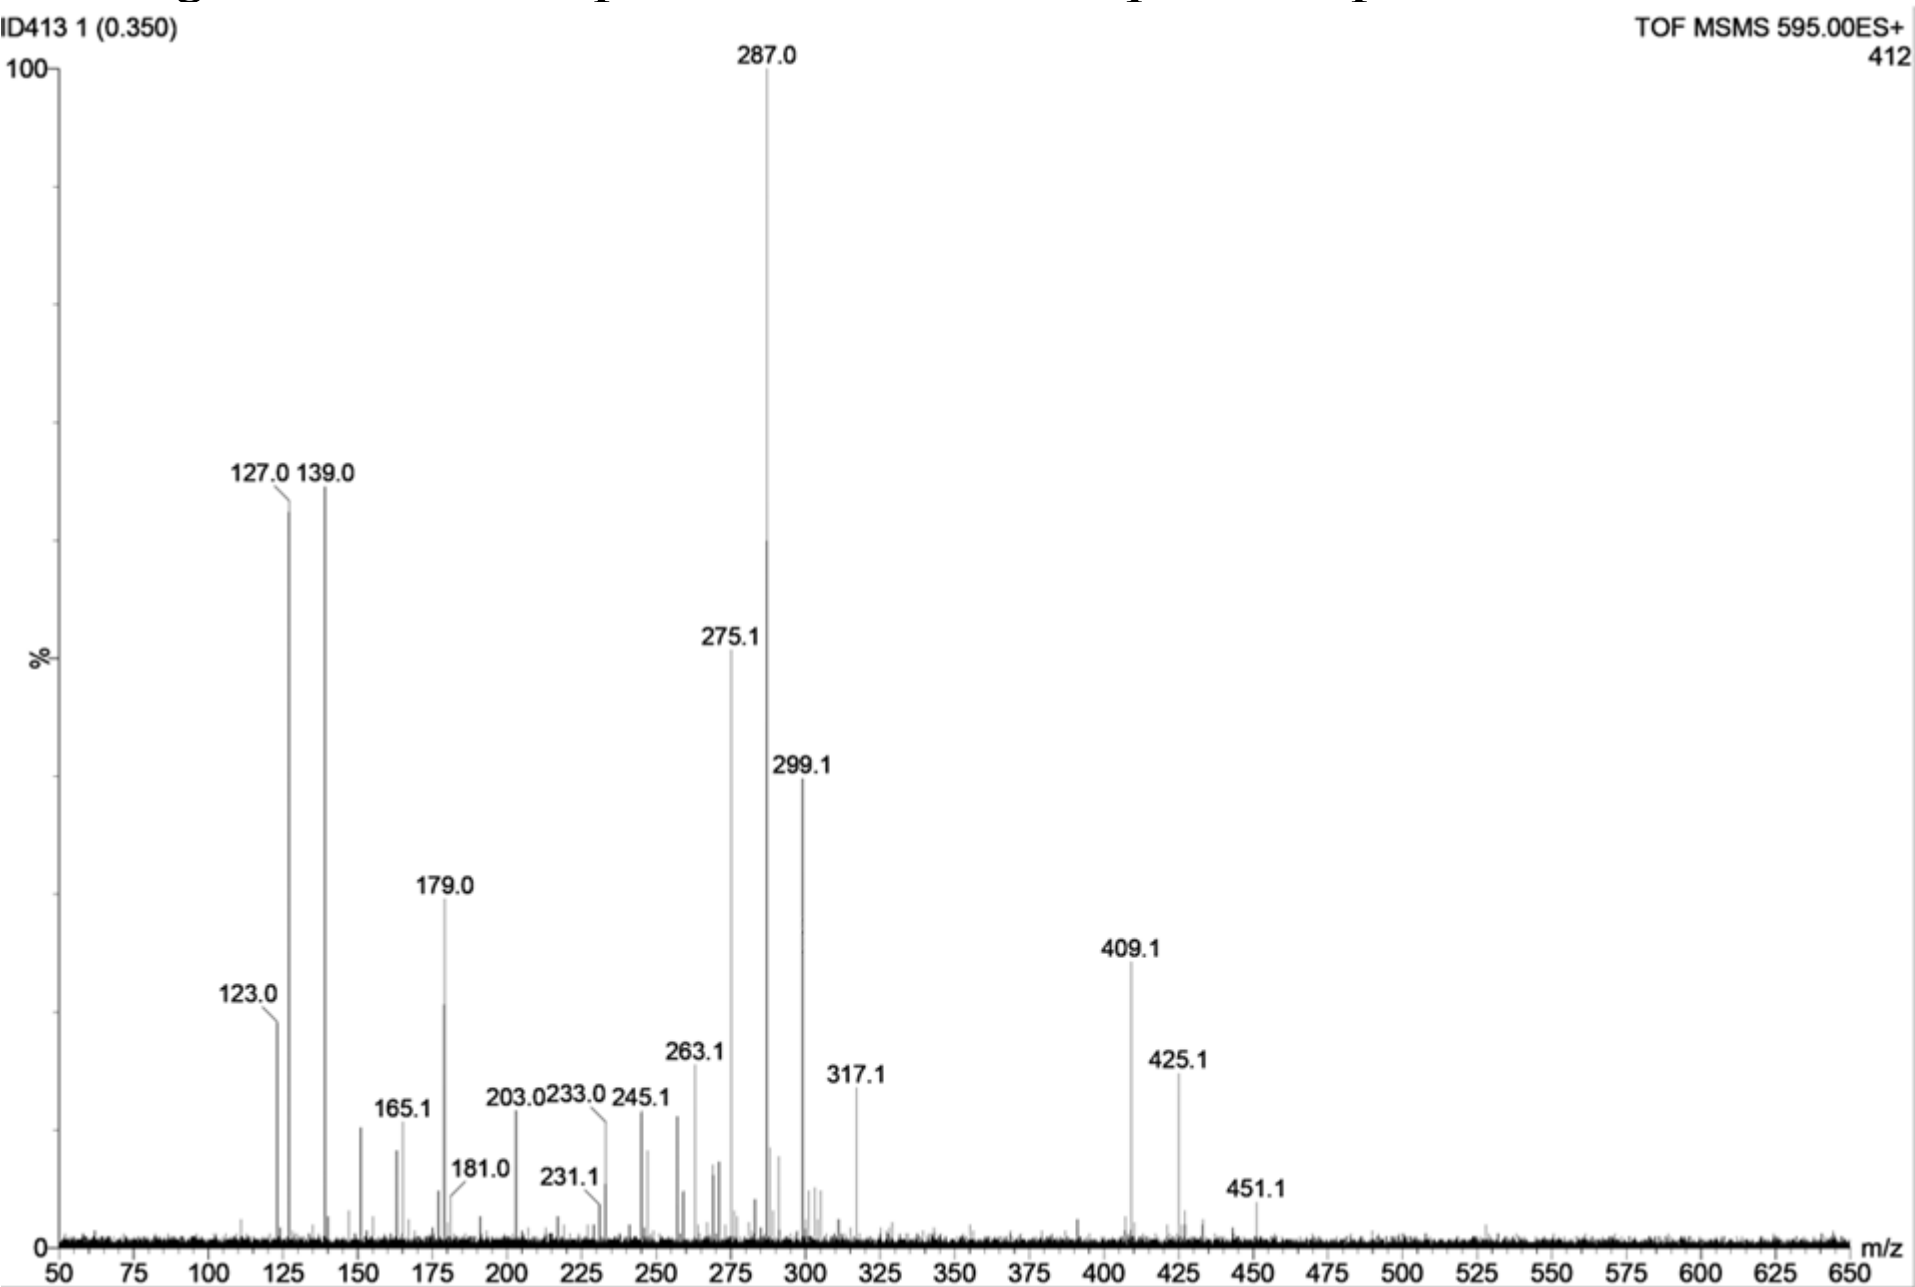

## Supplementary Materials

Figure 4 - MS/MS spectrum at  $m/z$  609 and 611 acquired in positive ion mode

$m/z$  609 and 611: dimeric (epi)gallocatechin A- and B-type

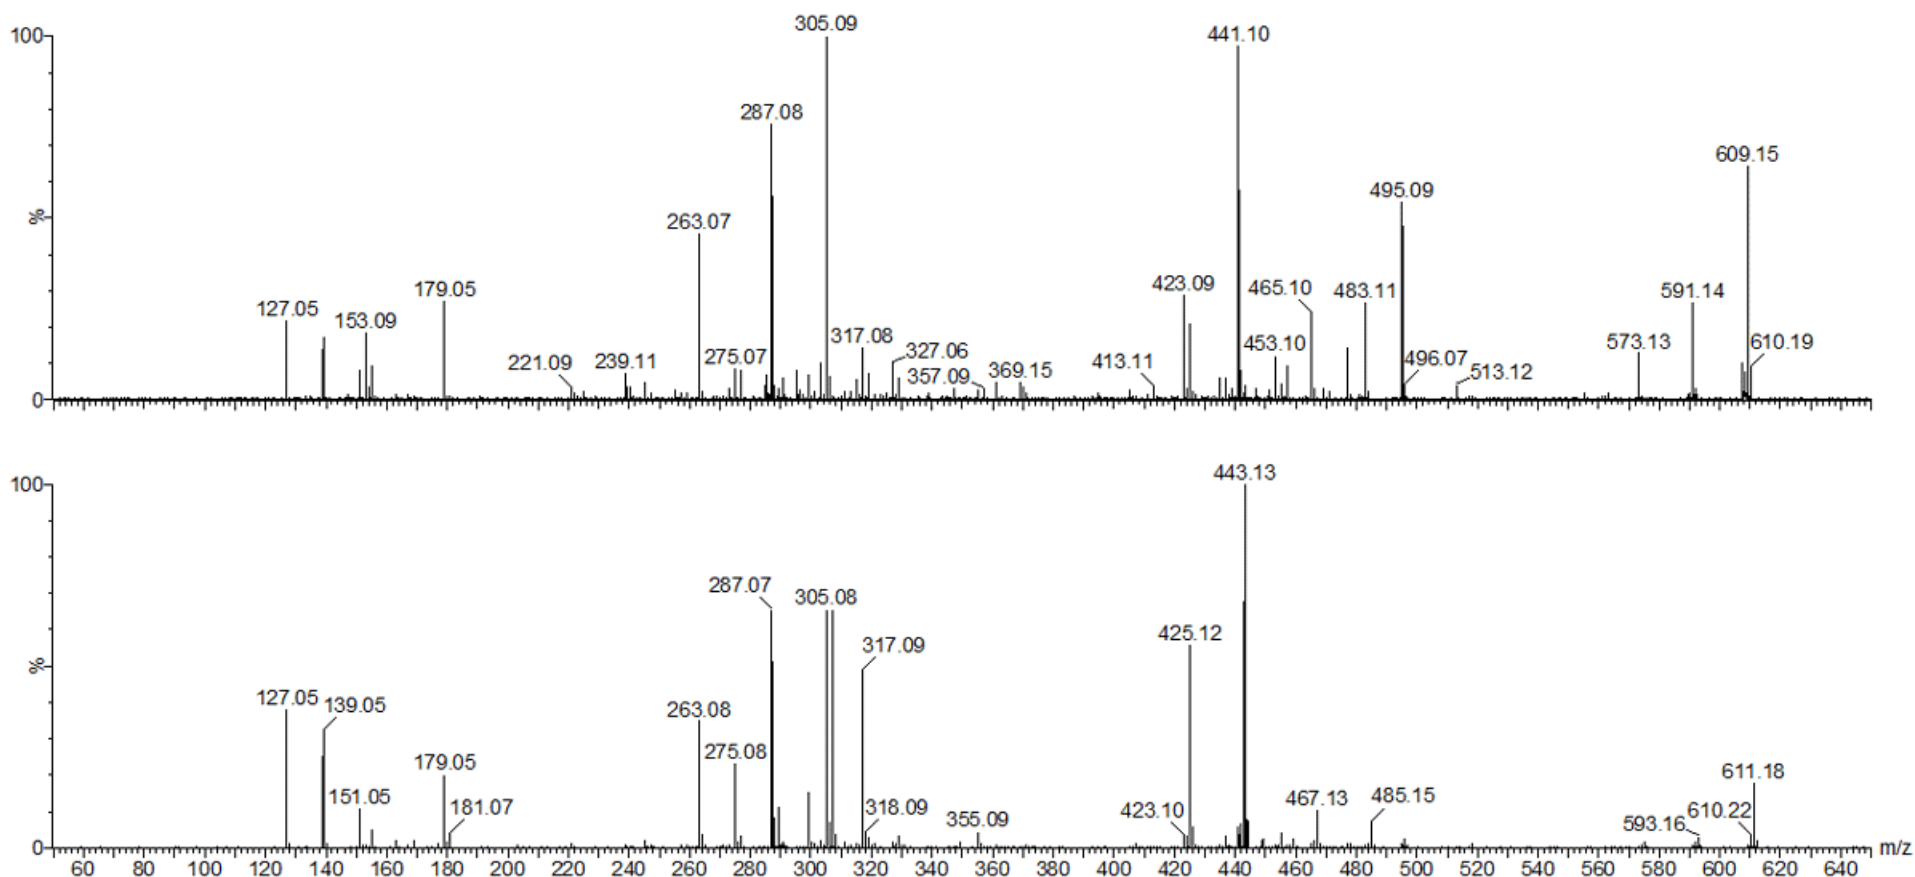

# Supplementary Materials

Figure 5 - MS/MS spectrum at  $m/z$  731 acquired in positive ion mode

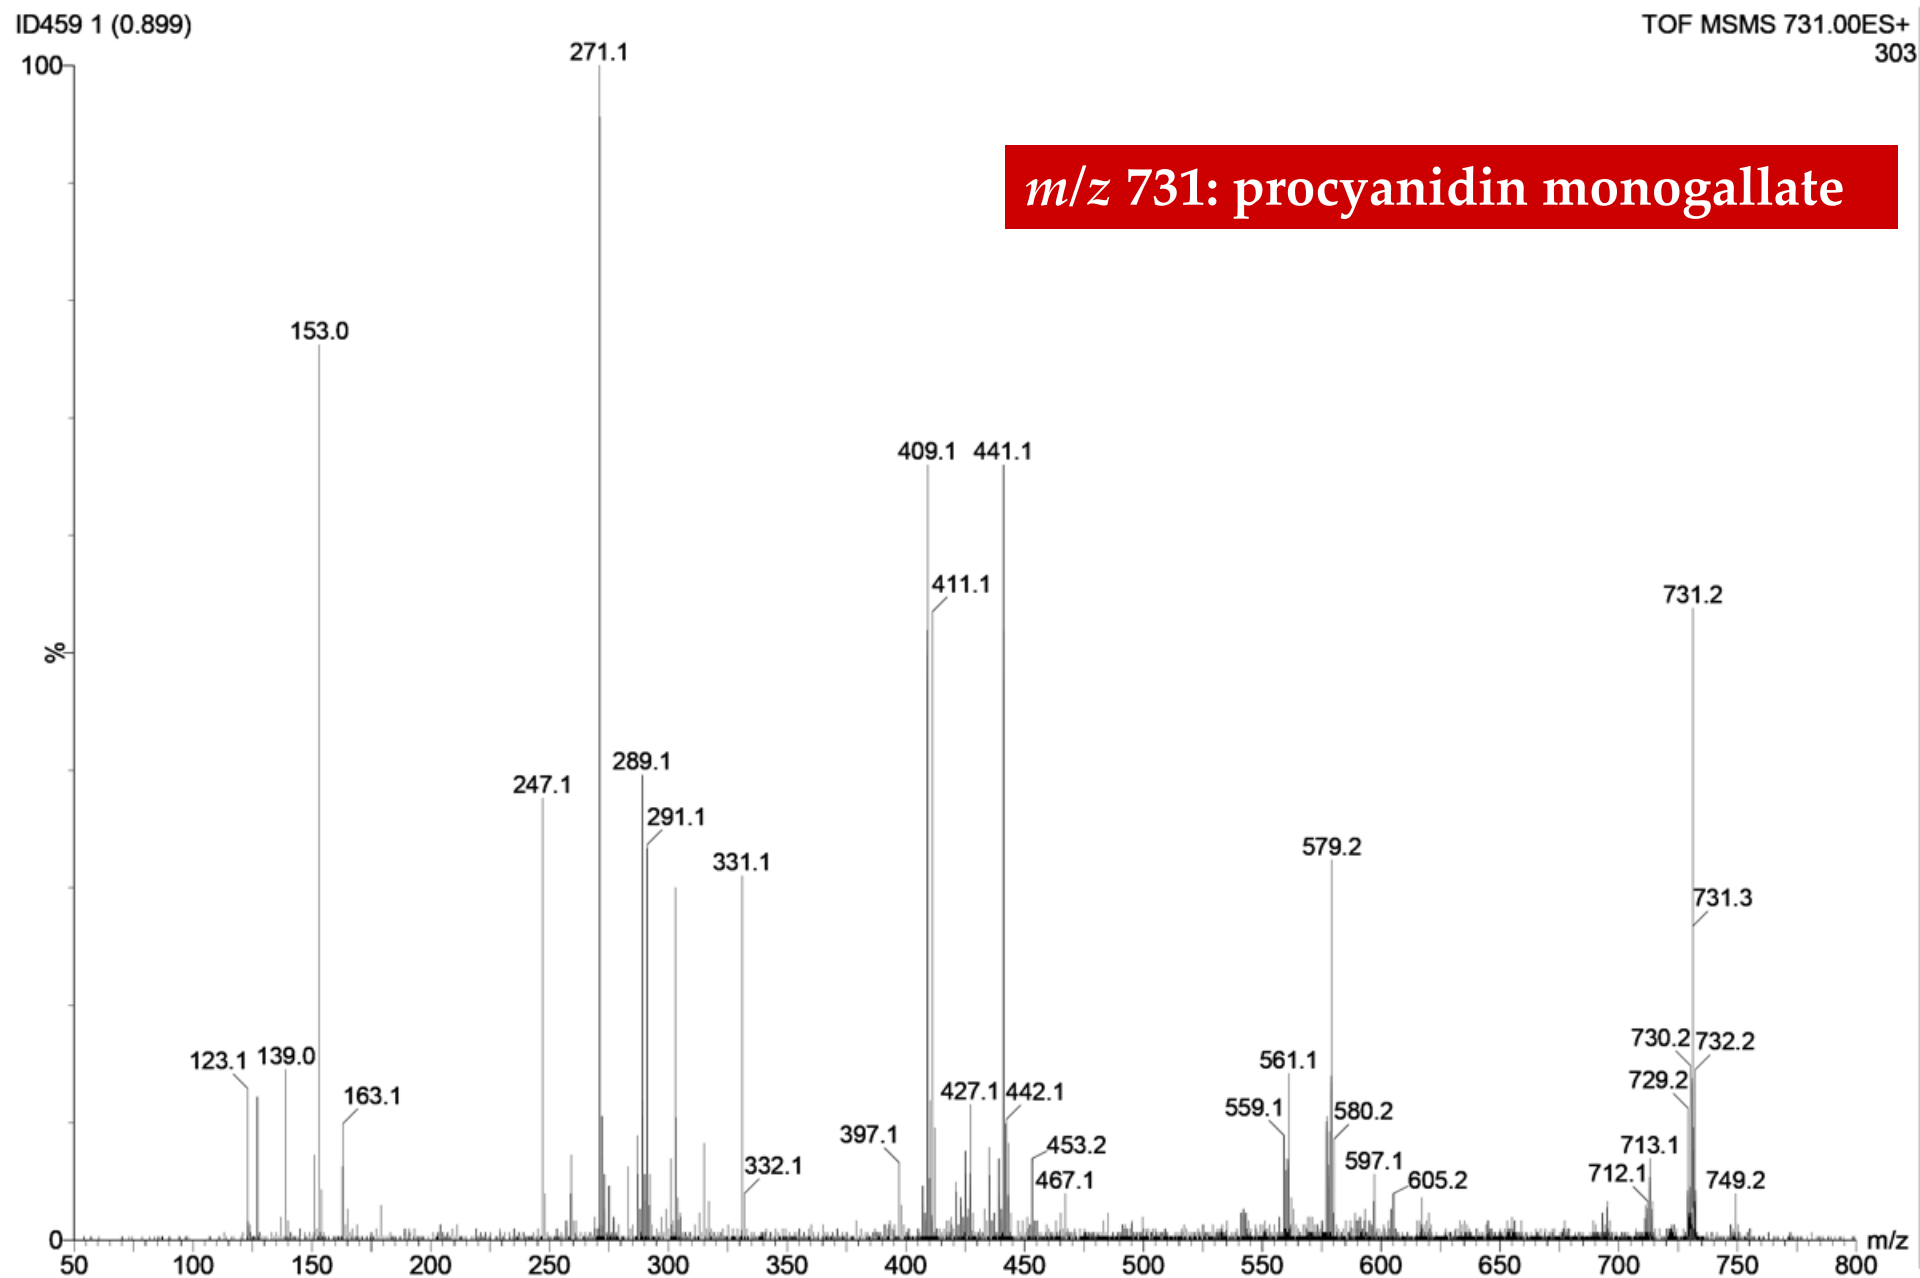

# Supplementary Materials

Figure 6 - MS/MS spectrum at  $m/z$  867 acquired in positive ion mode

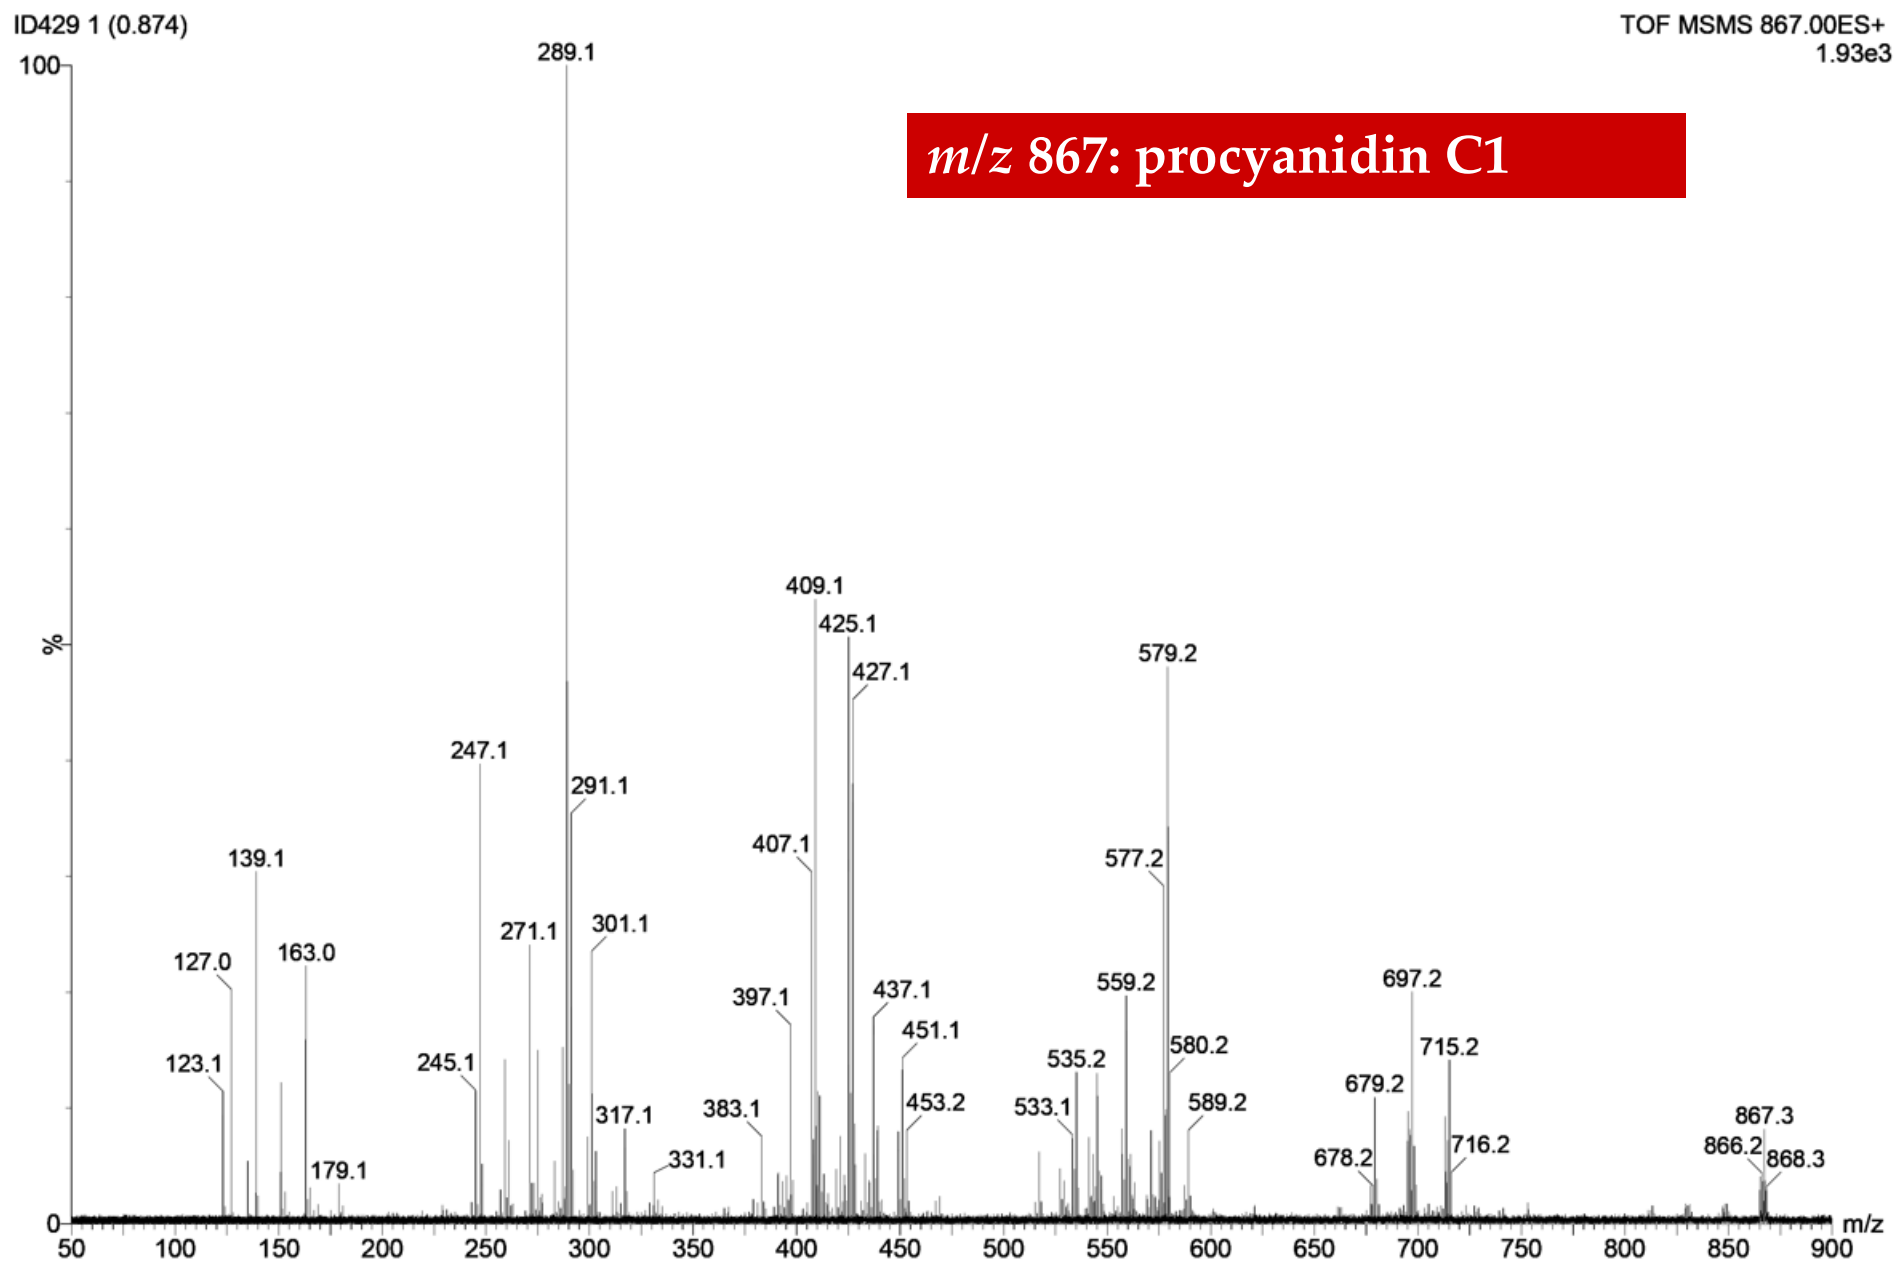

# Supplementary Materials

Figure 7 - MS/MS spectrum at  $m/z$  899 acquired in positive ion mode

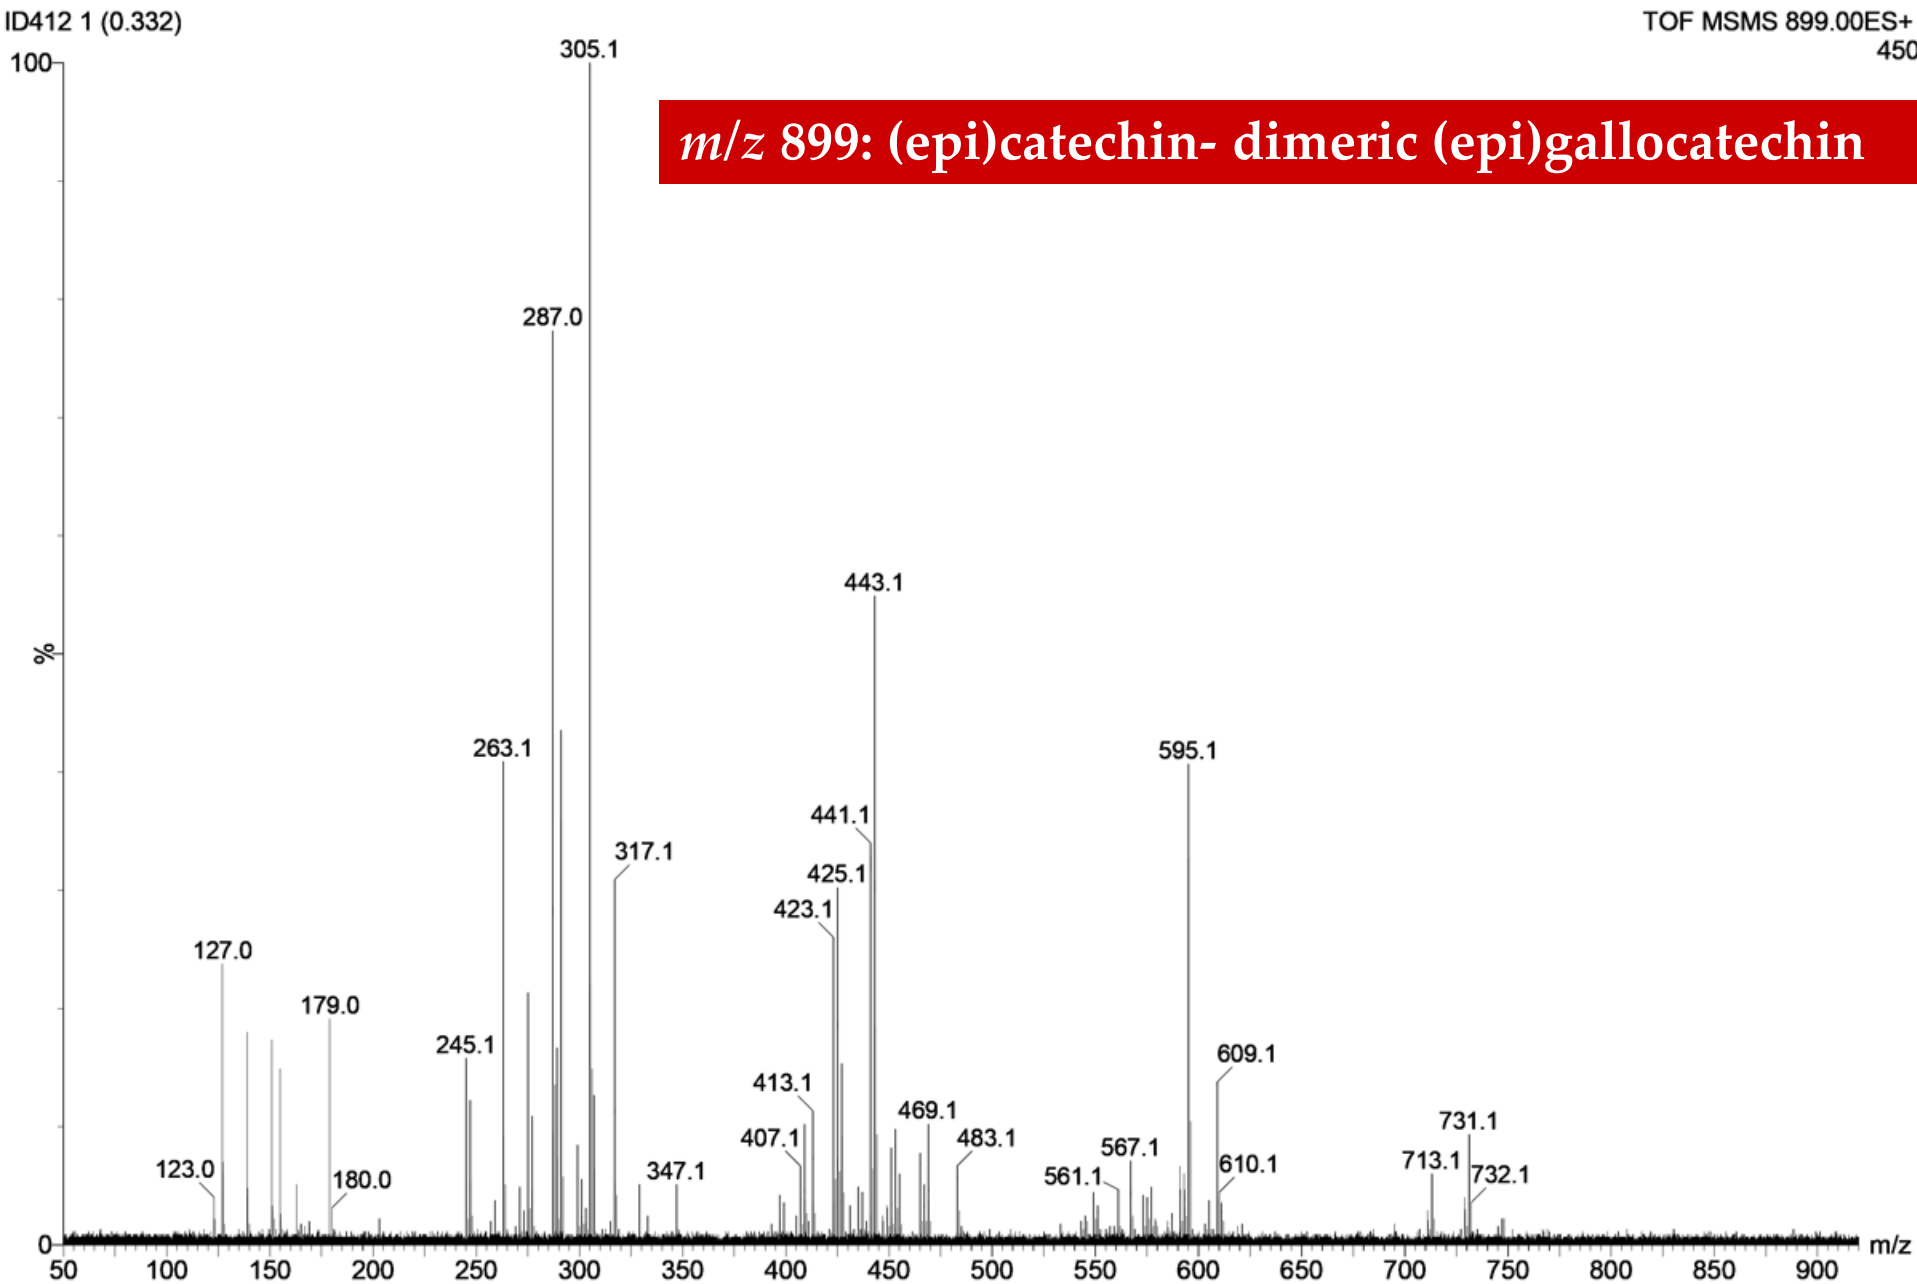



# Supplementary Materials

## Figure 8 - MS/MS spectrum at $m/z$ 935 acquired in positive ion mode

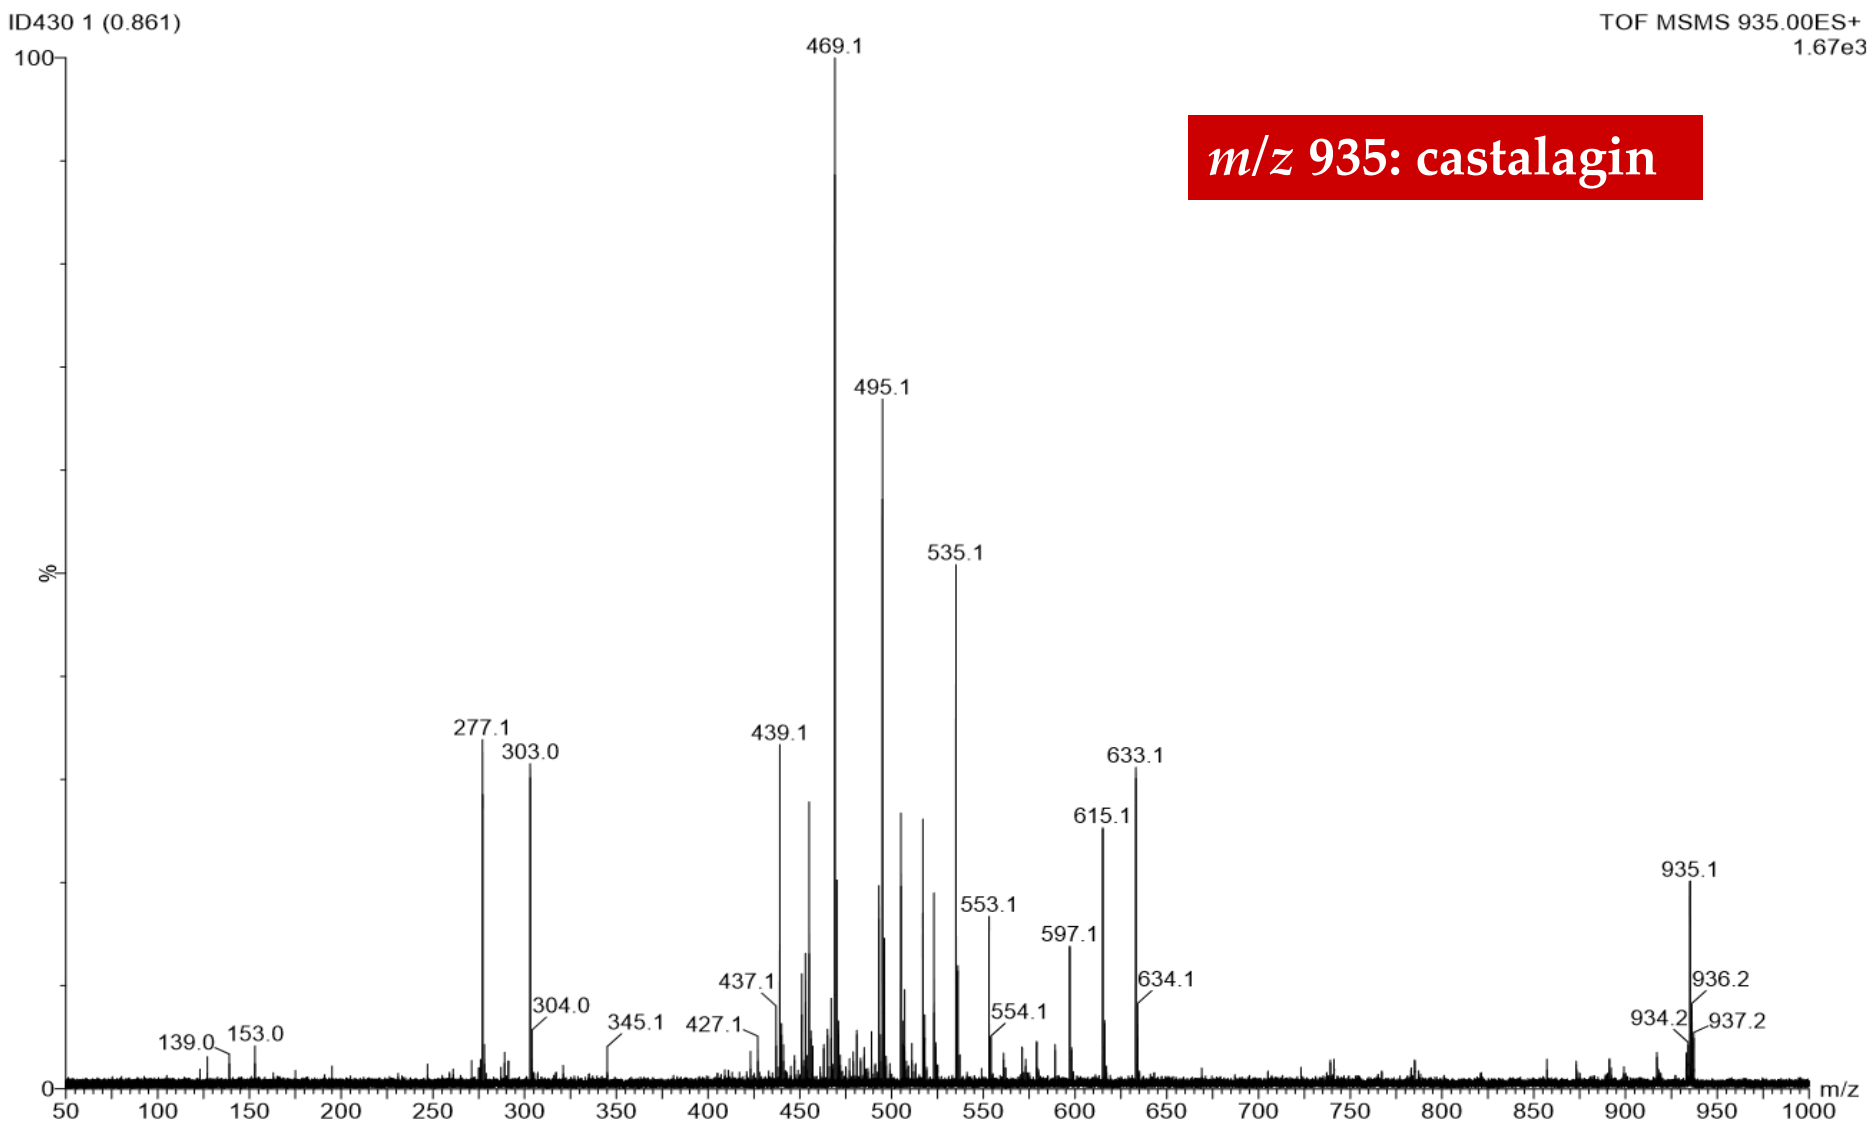

# Supplementary Materials

Figure 9 - MS/MS spectrum at  $m/z$  1019 acquired in positive ion mode

13ID000010 1 (1.348)

TOF MSMS 1019.00ES+  
48

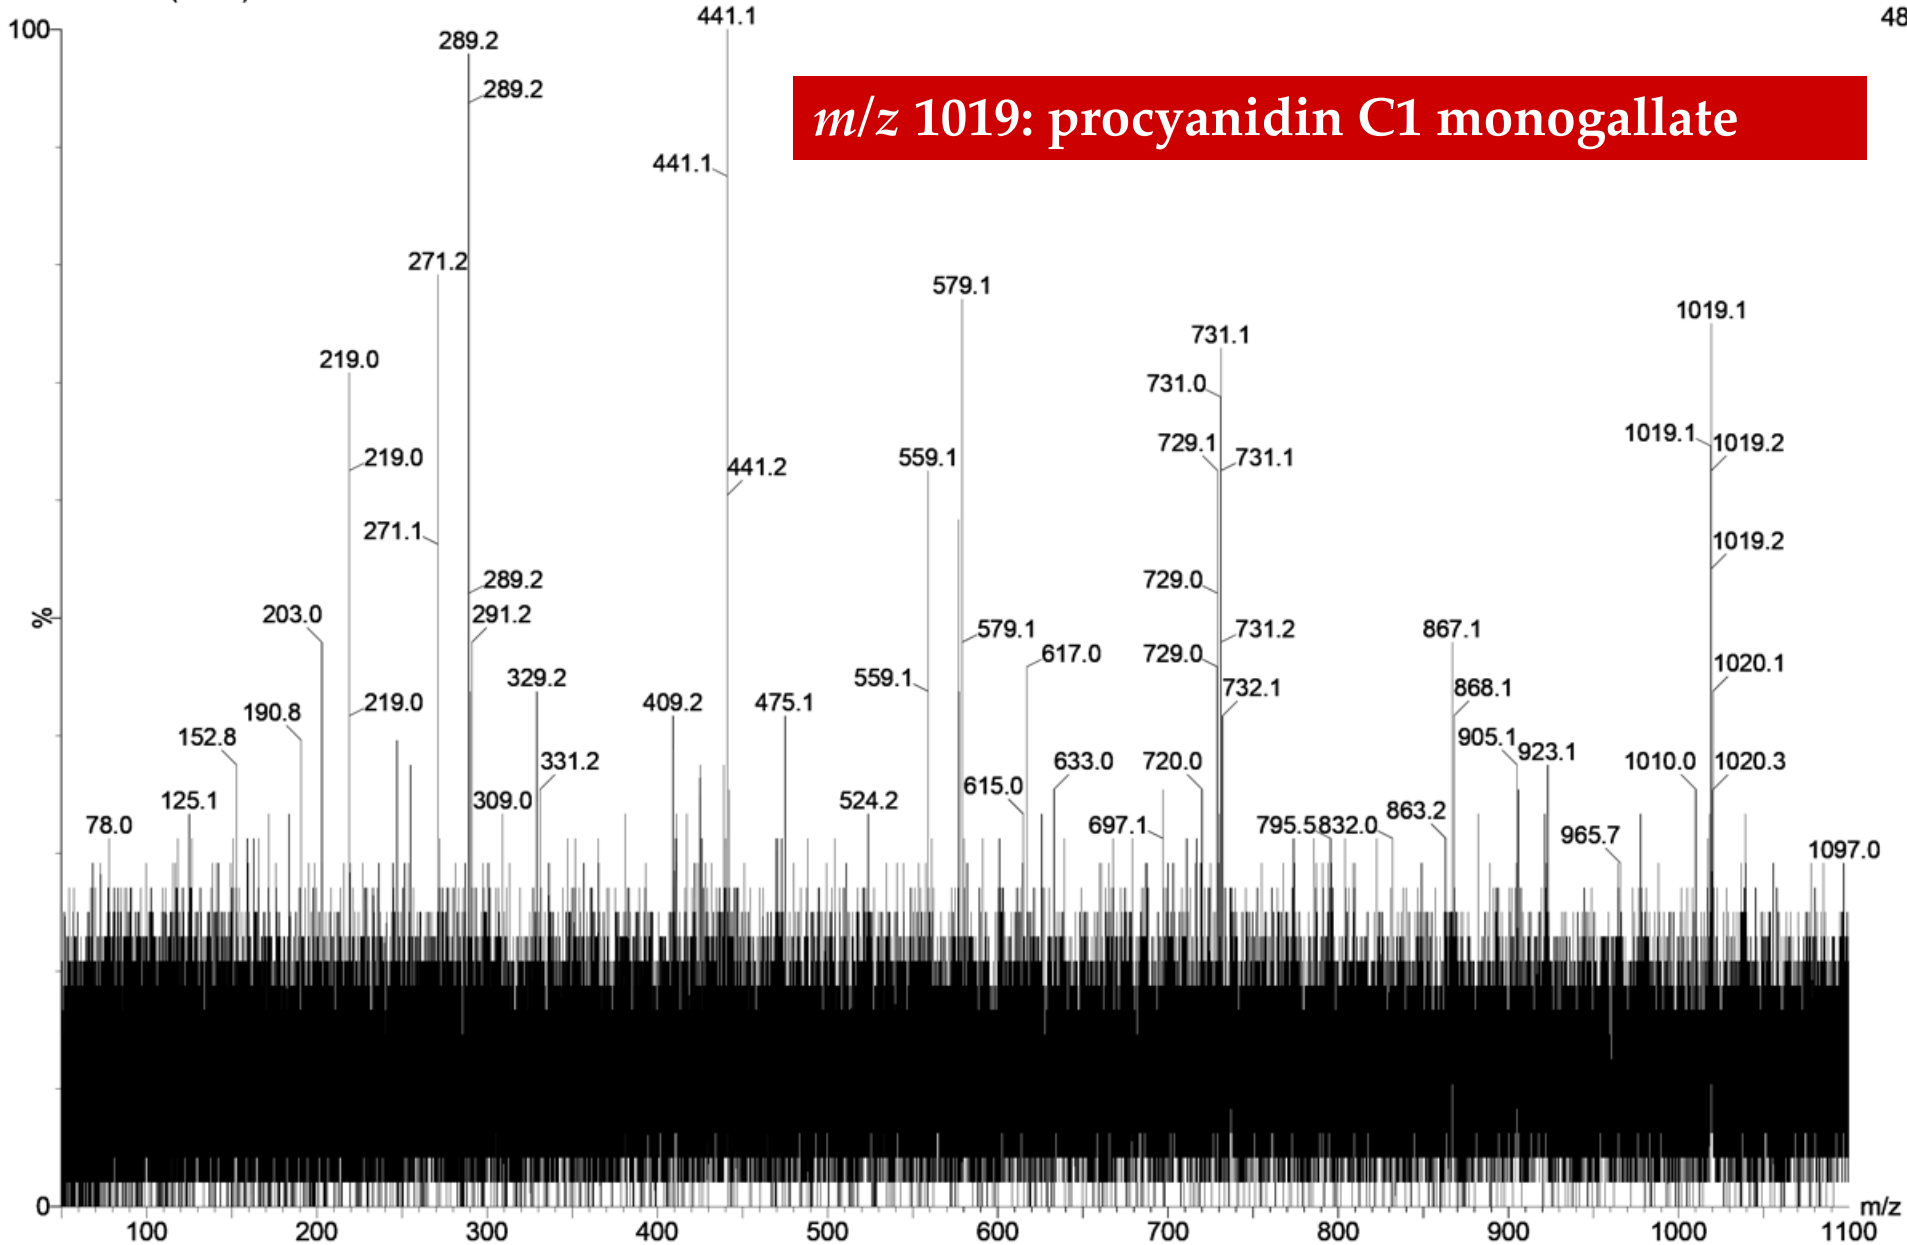

# Supplementary Materials

Figure 10 - MS/MS spectrum at  $m/z$  1155 acquired in positive ion mode

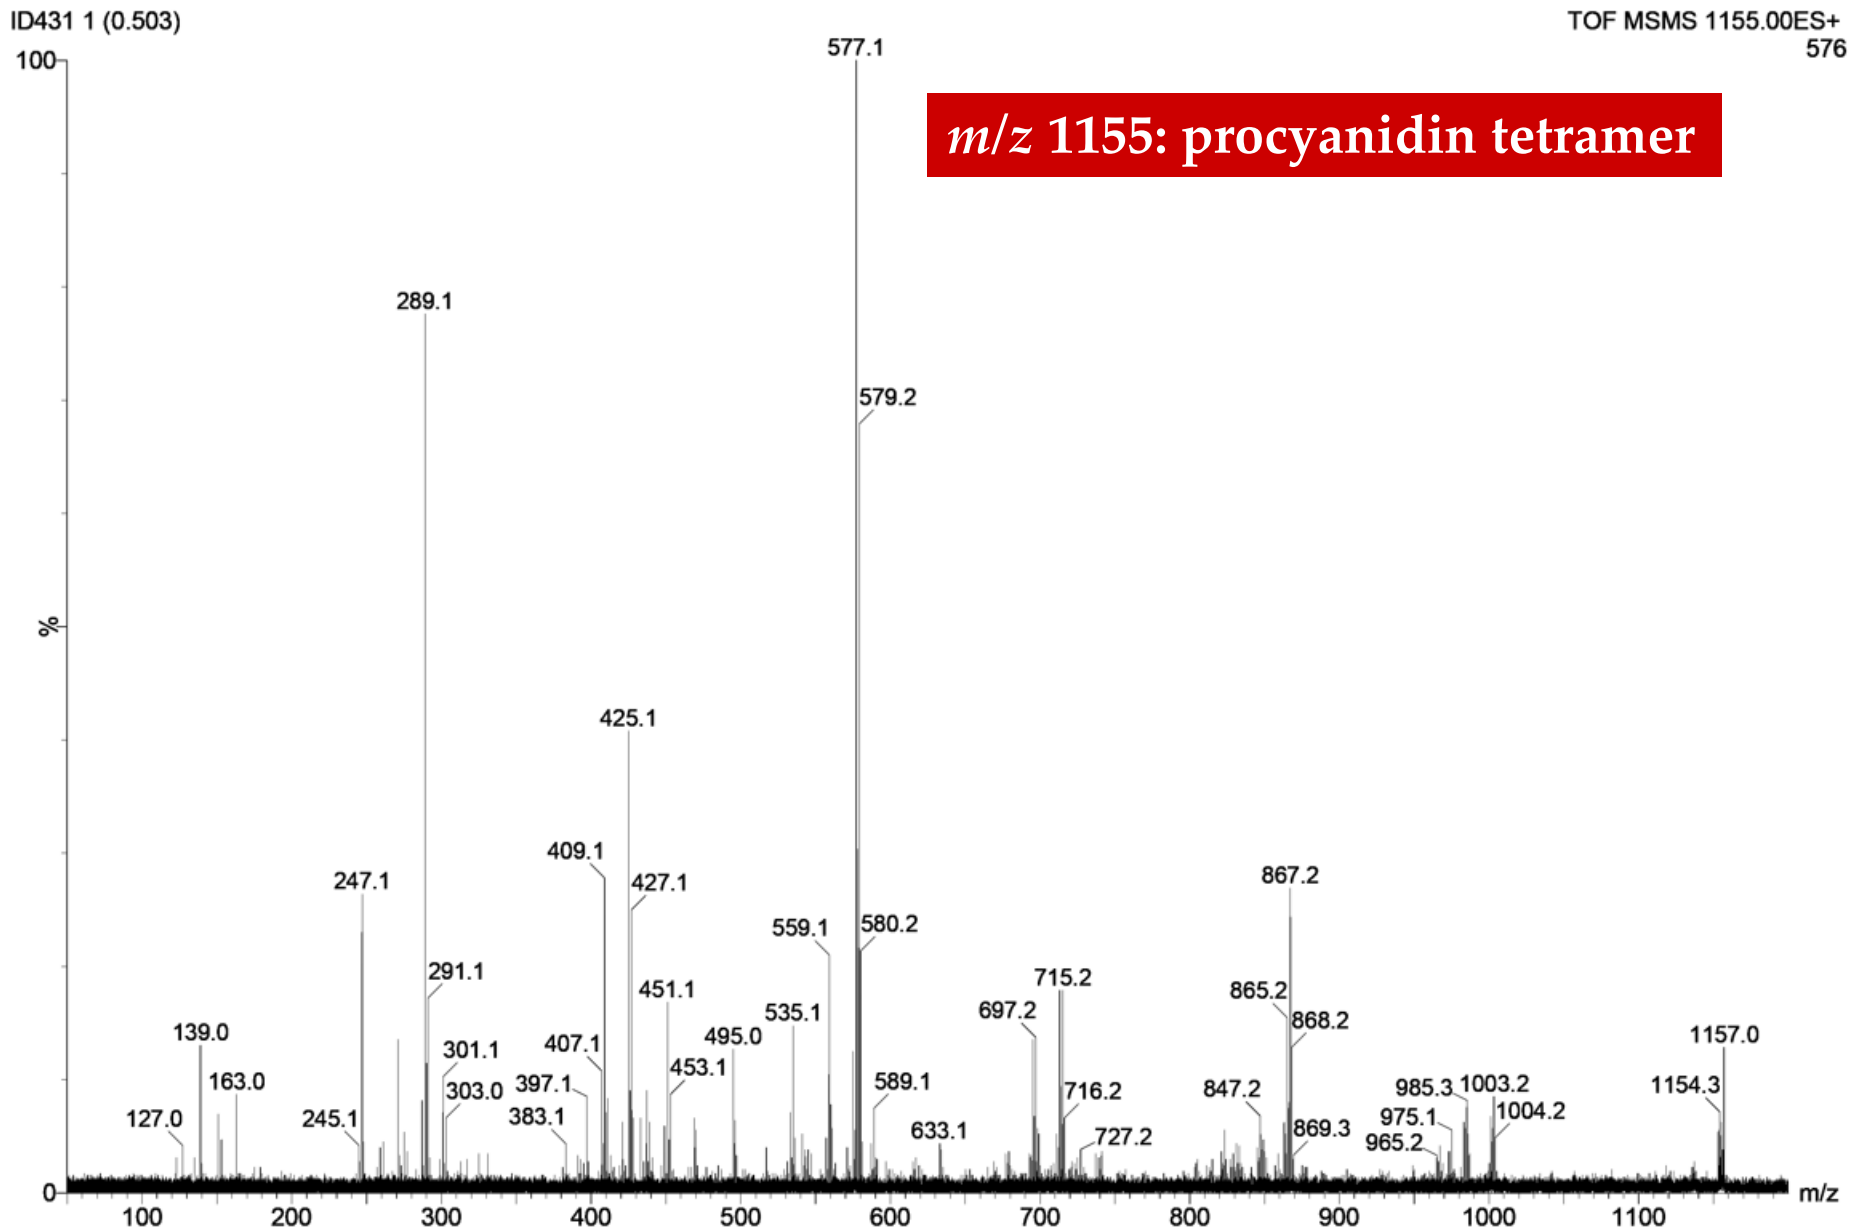

# Supplementary Materials

## Figure 11 - MS/MS spectrum at $m/z$ 1203 acquired in positive ion mode

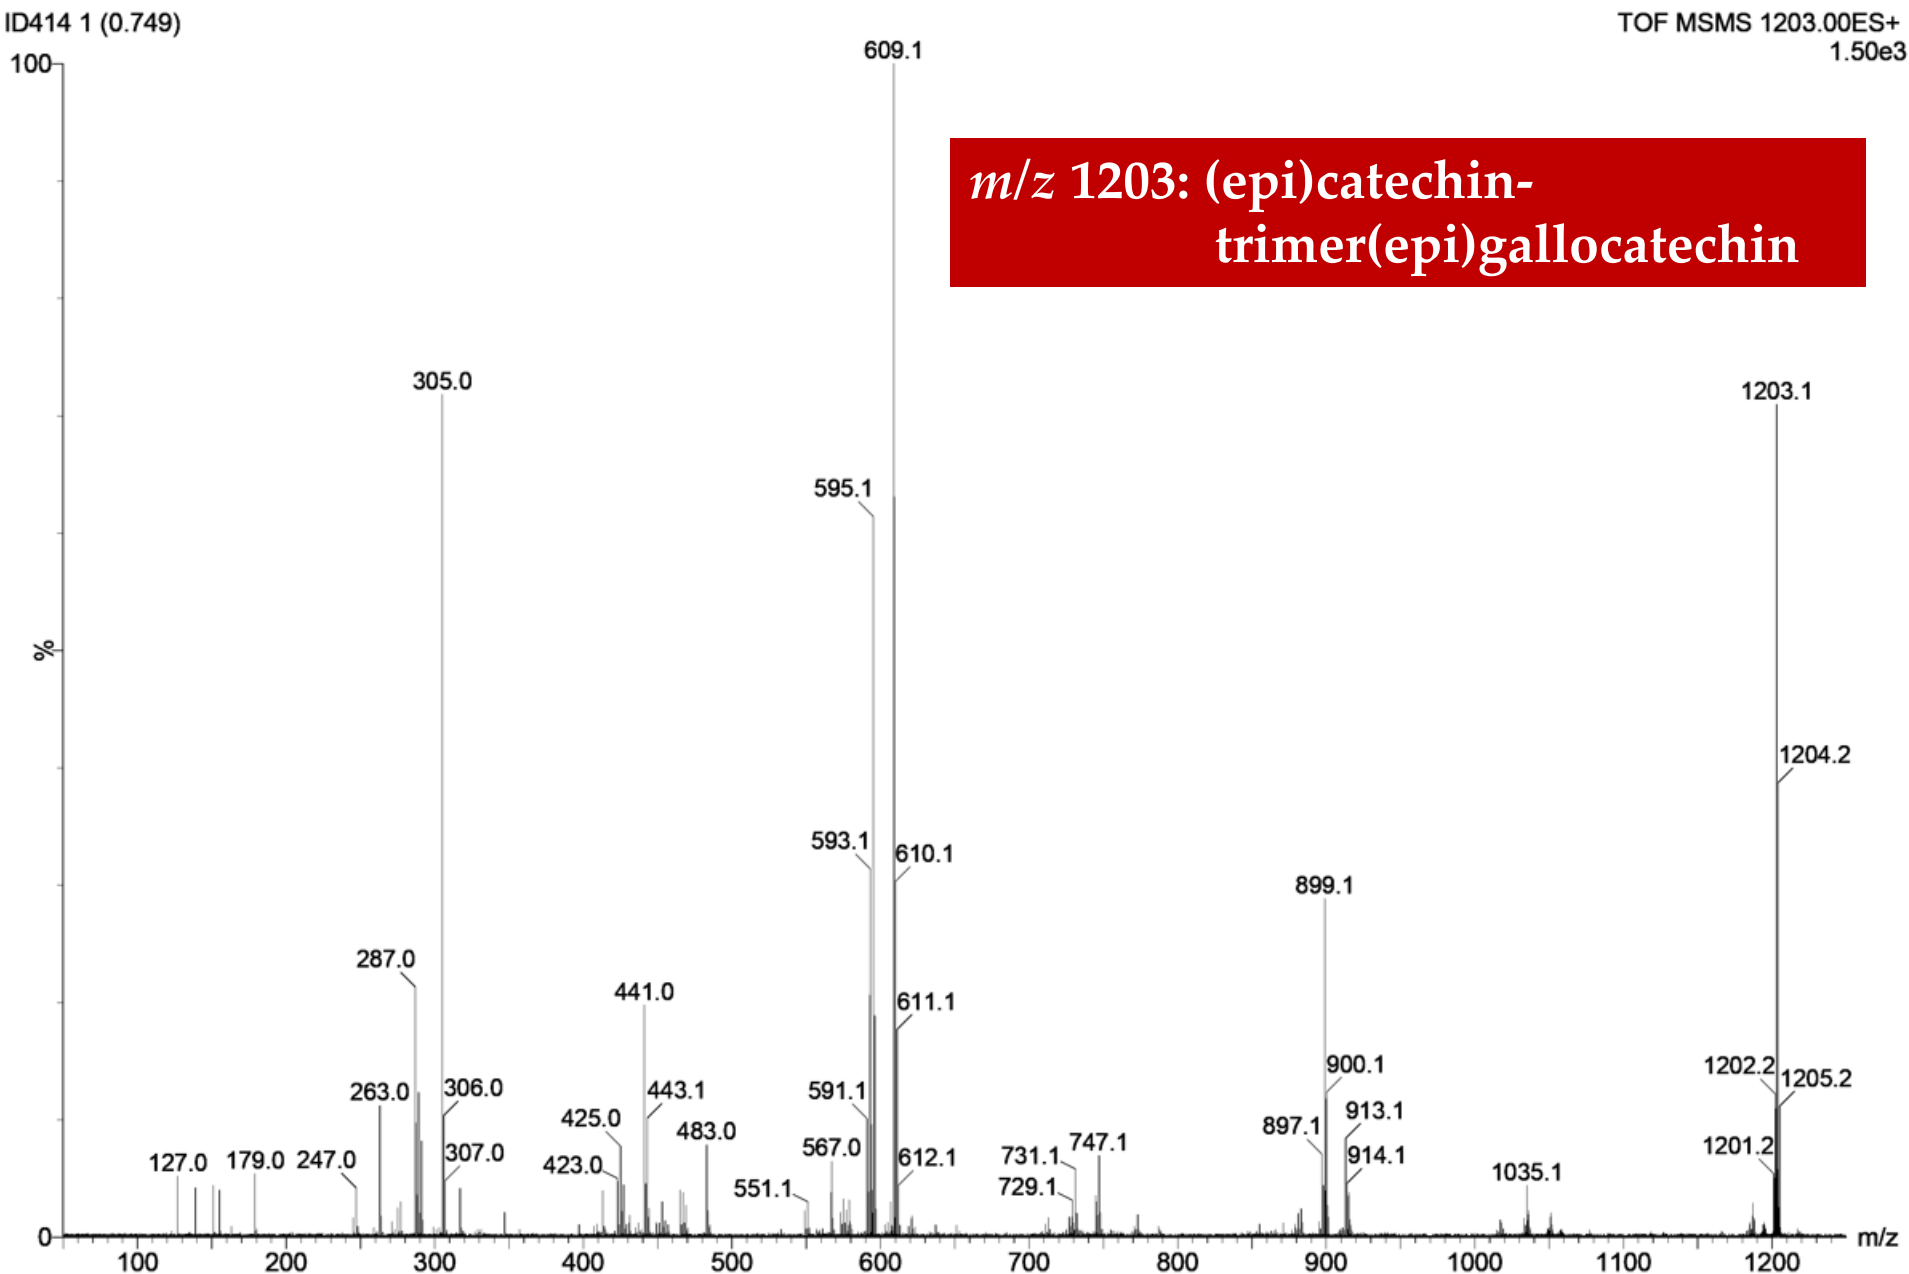

# Supplementary Materials

Figure 12 - MS/MS spectrum at  $m/z$  1307 acquired in positive ion mode

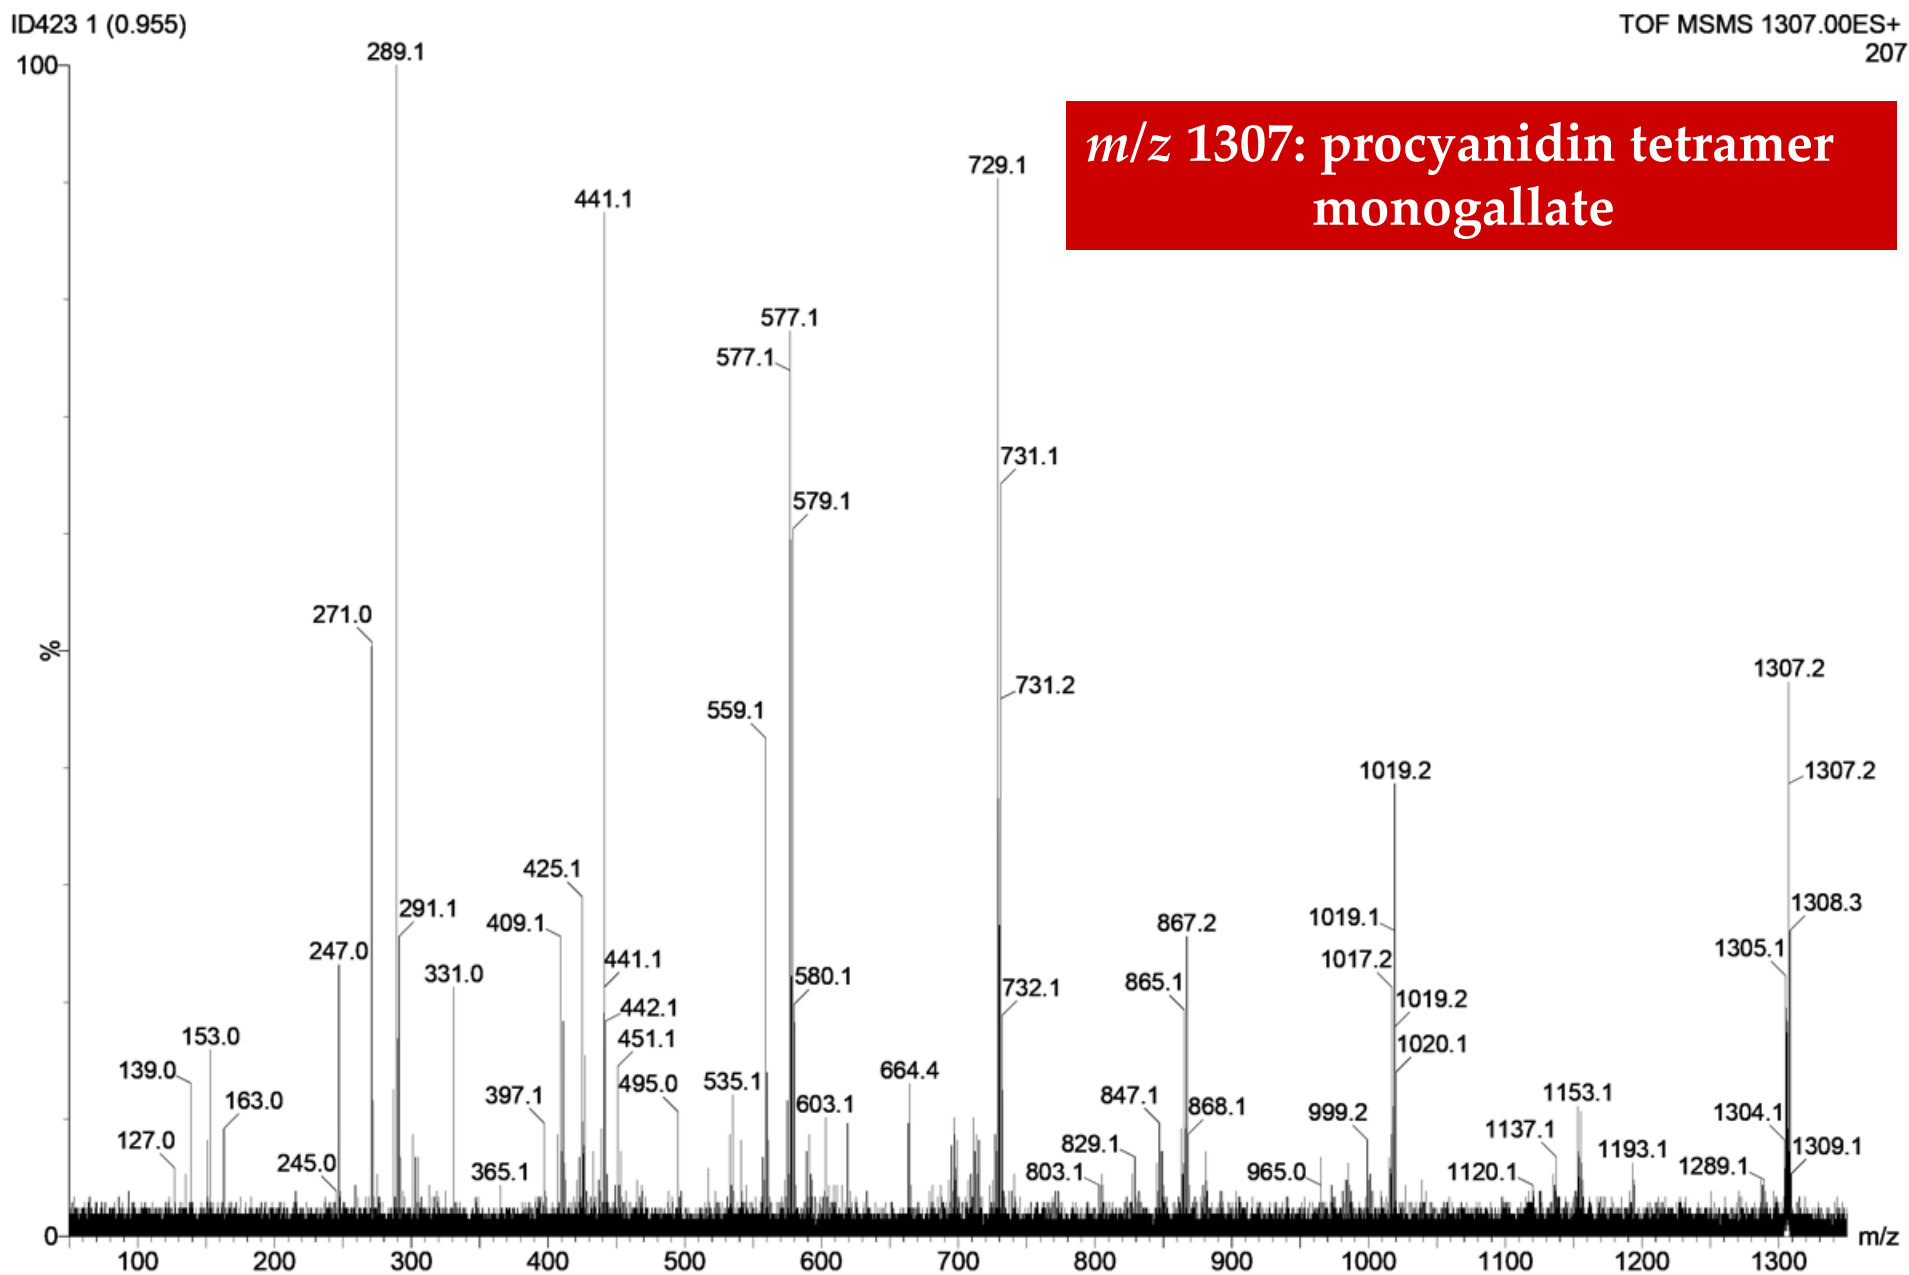

# Supplementary Materials

Figure 13 - MS/MS spectrum at  $m/z$  1443 acquired in positive ion mode

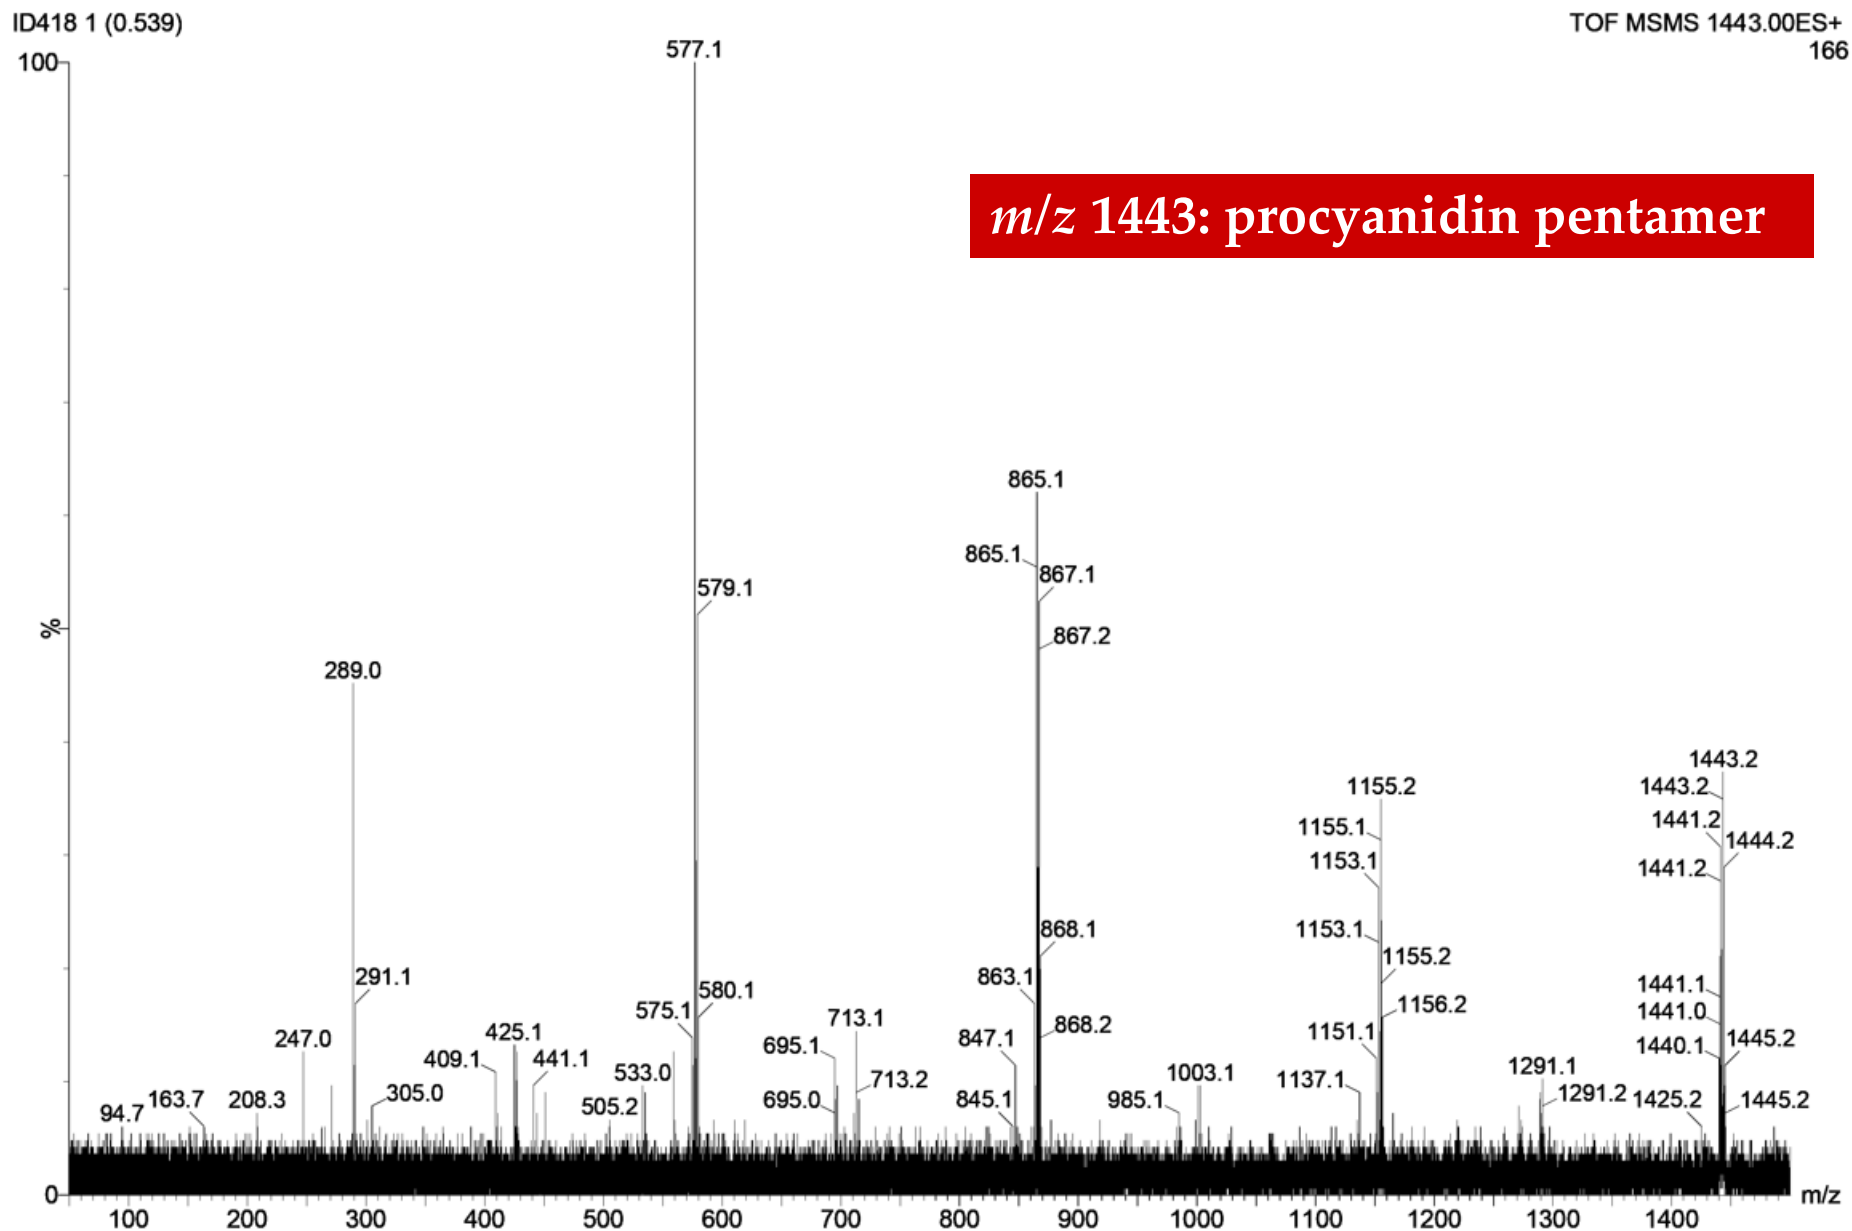

## Supplementary Materials

Figure 14 - MS/MS spectrum at  $m/z$  1507 acquired in positive ion mode

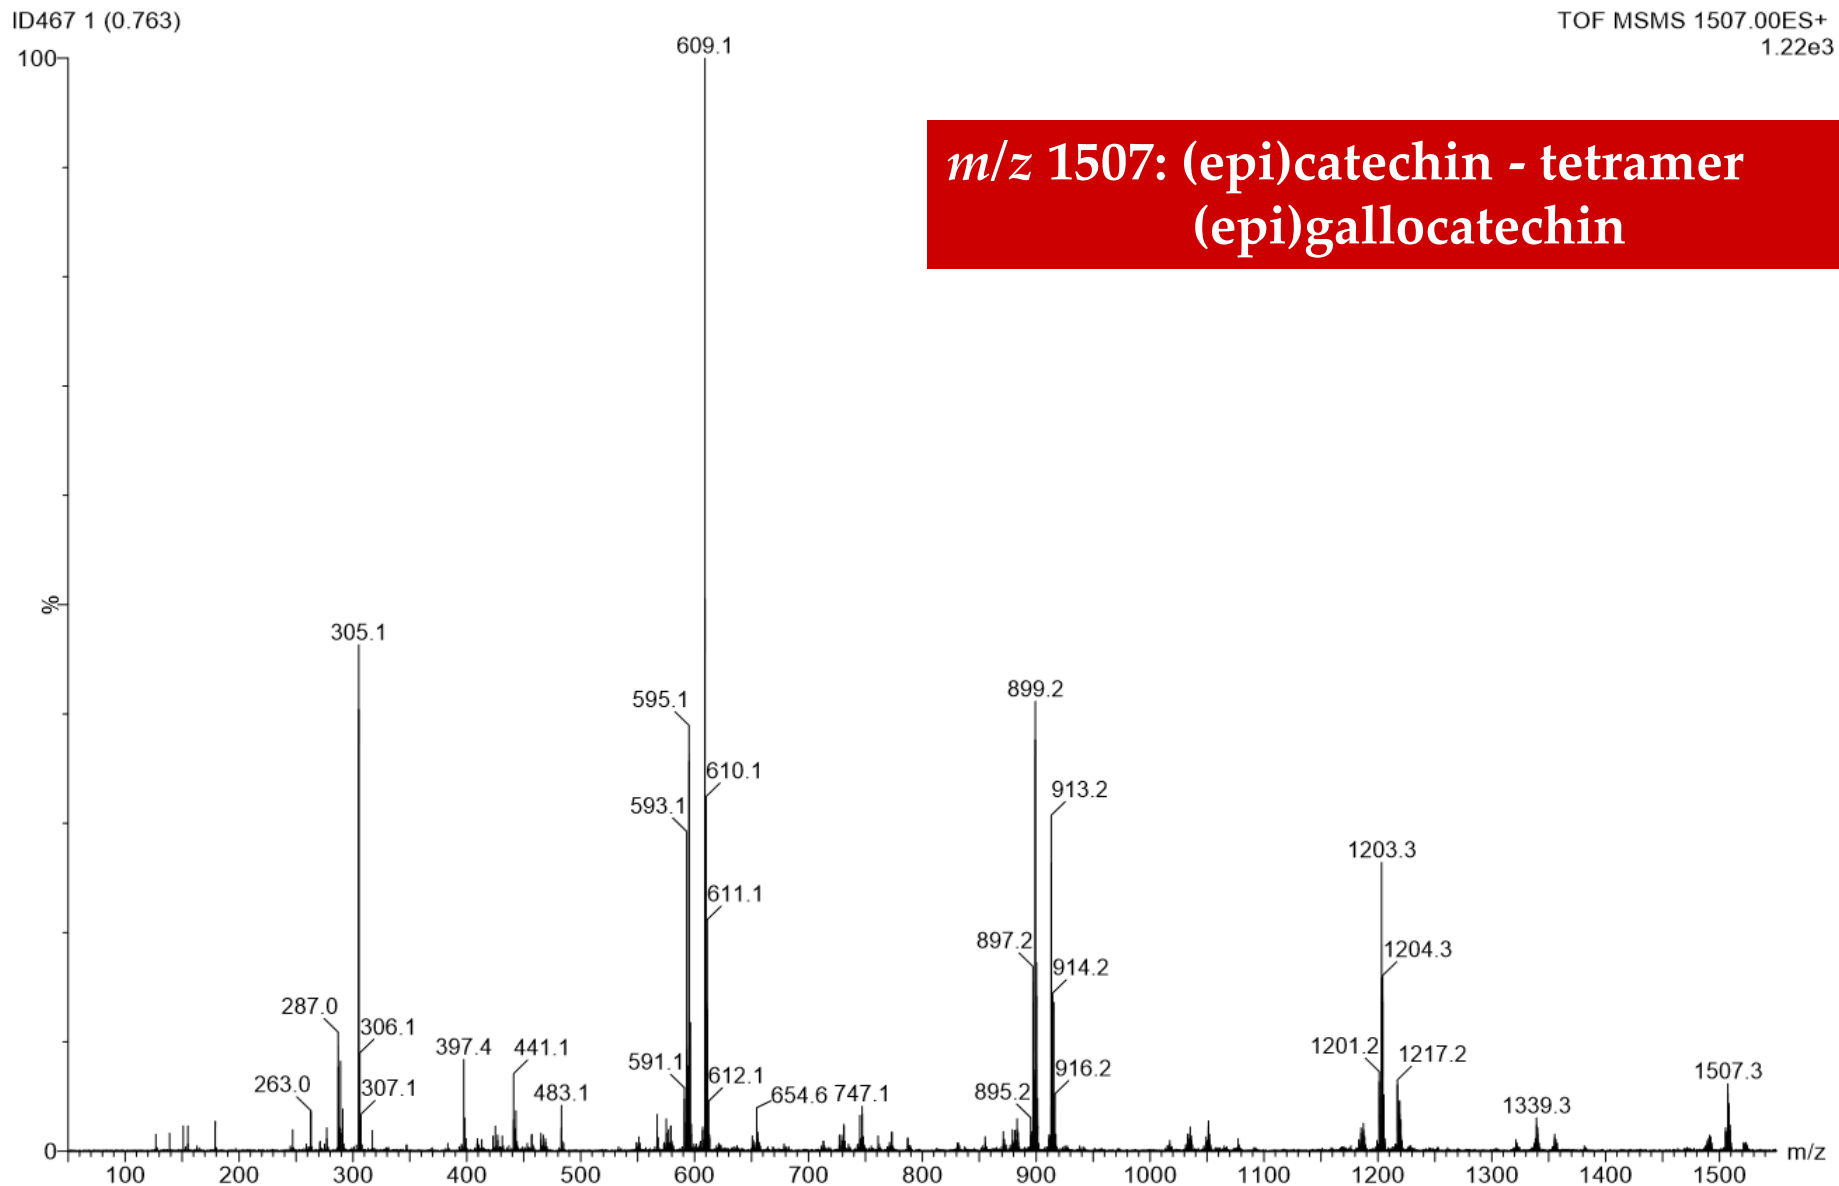

# Supplementary Materials

## Figure 15 - MS/MS spectrum at $m/z$ 1595 acquired in positive ion mode

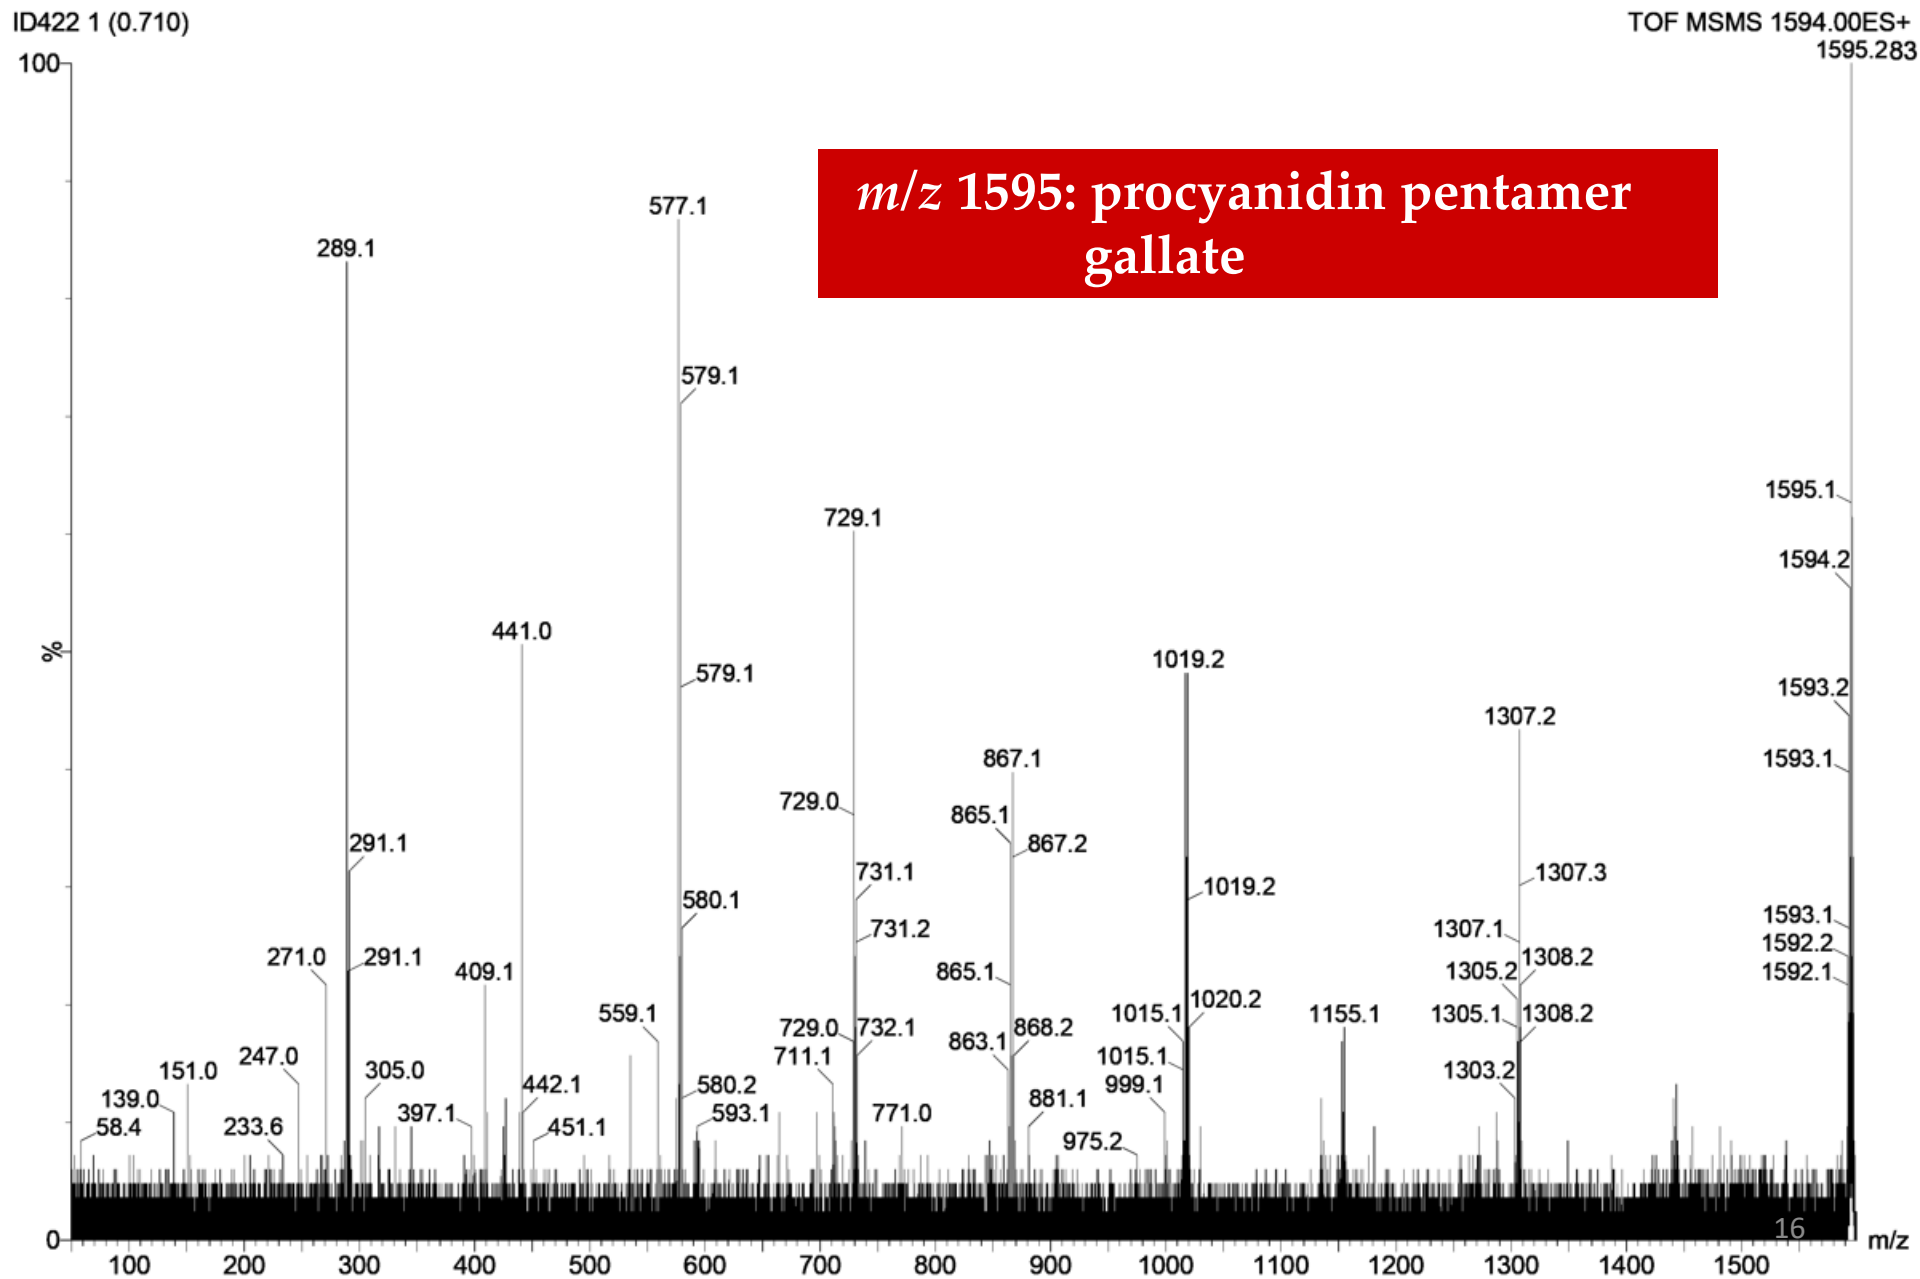



# Supplementary Materials

Figure 16 - MS/MS spectrum at  $m/z$  1747 acquired in positive ion mode

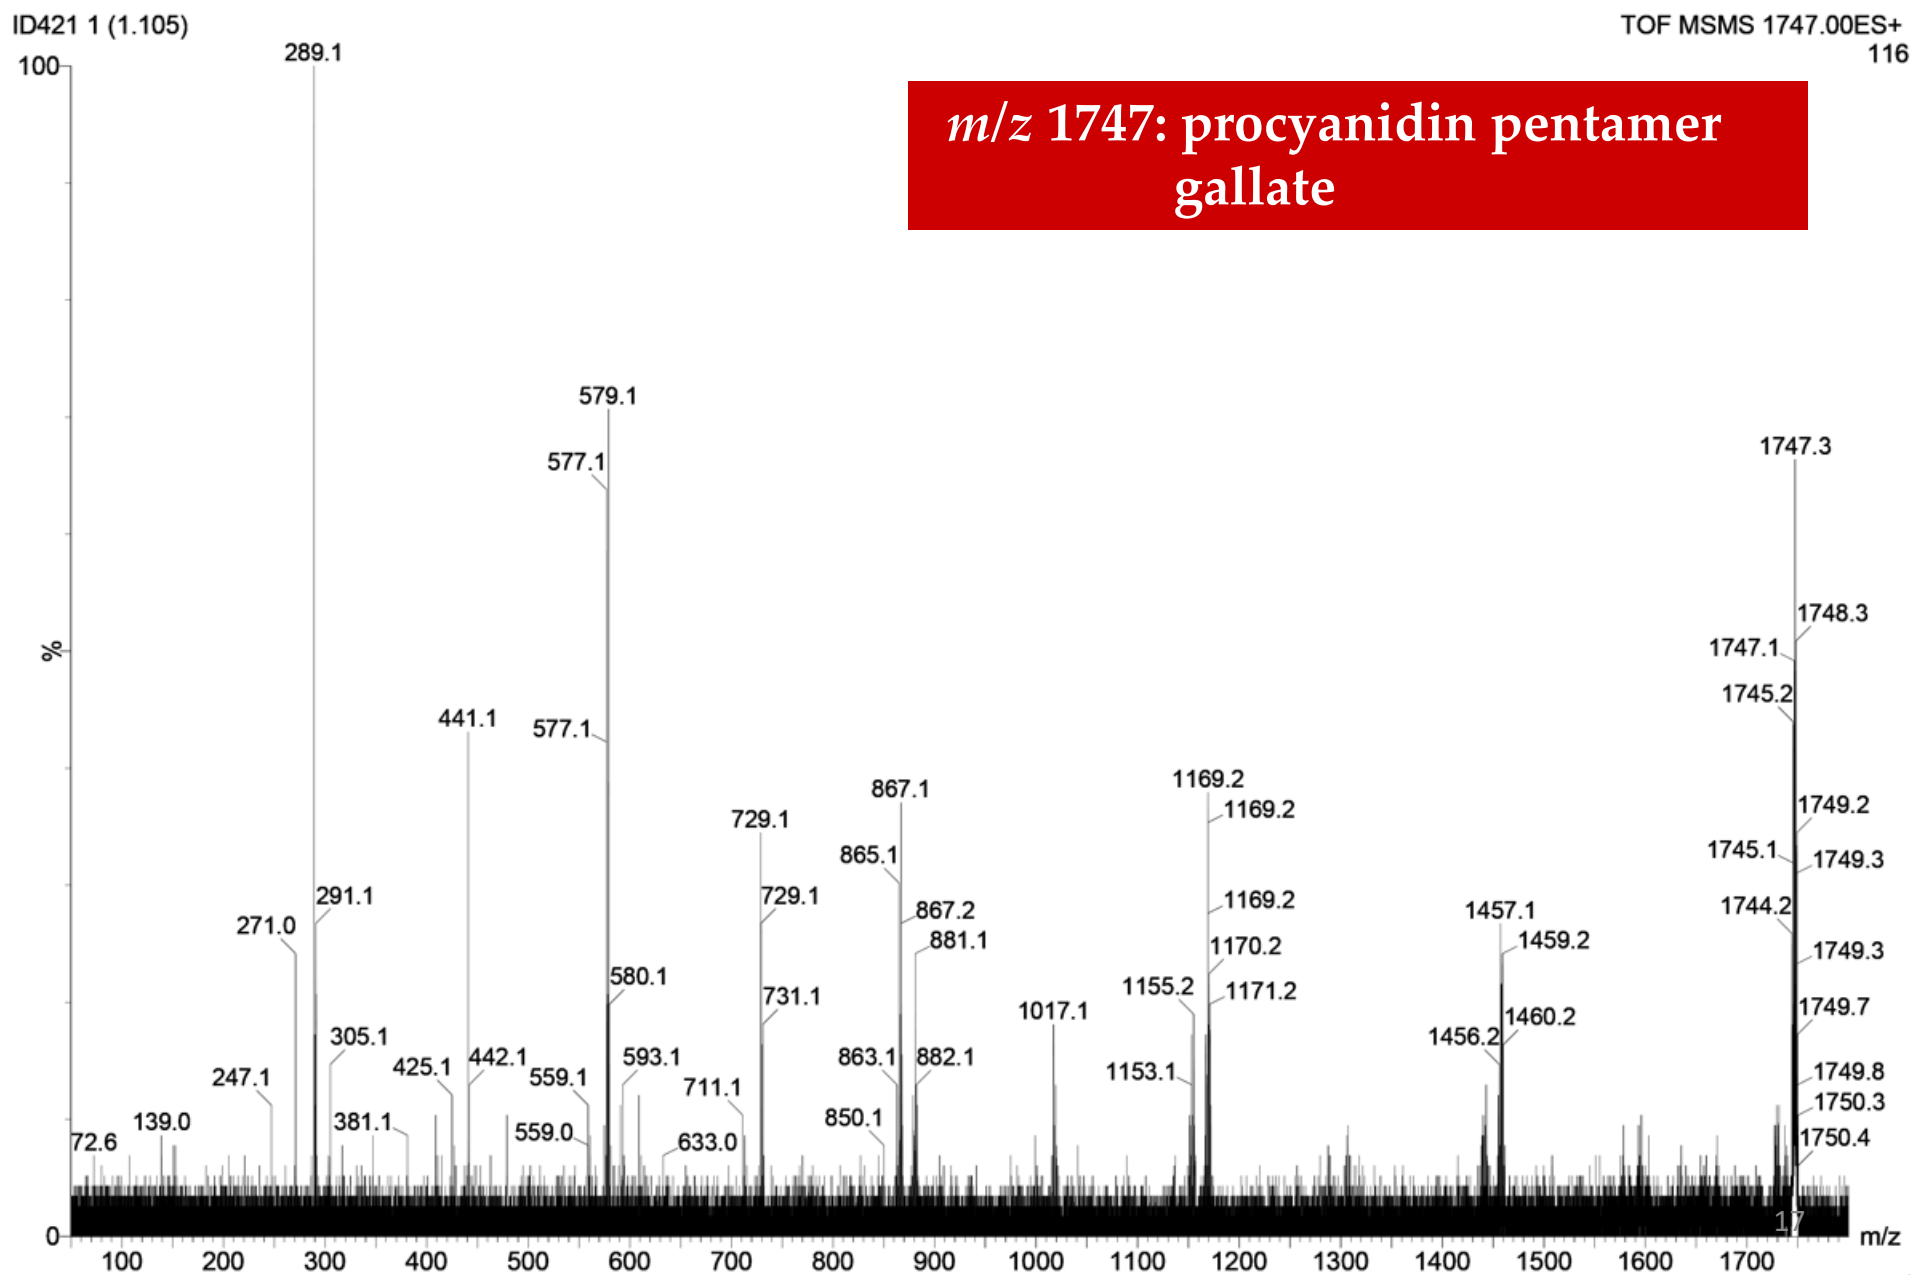

# Supplementary Materials

Figure 17 - MS/MS spectrum at  $m/z$  1811 acquired in positive mode

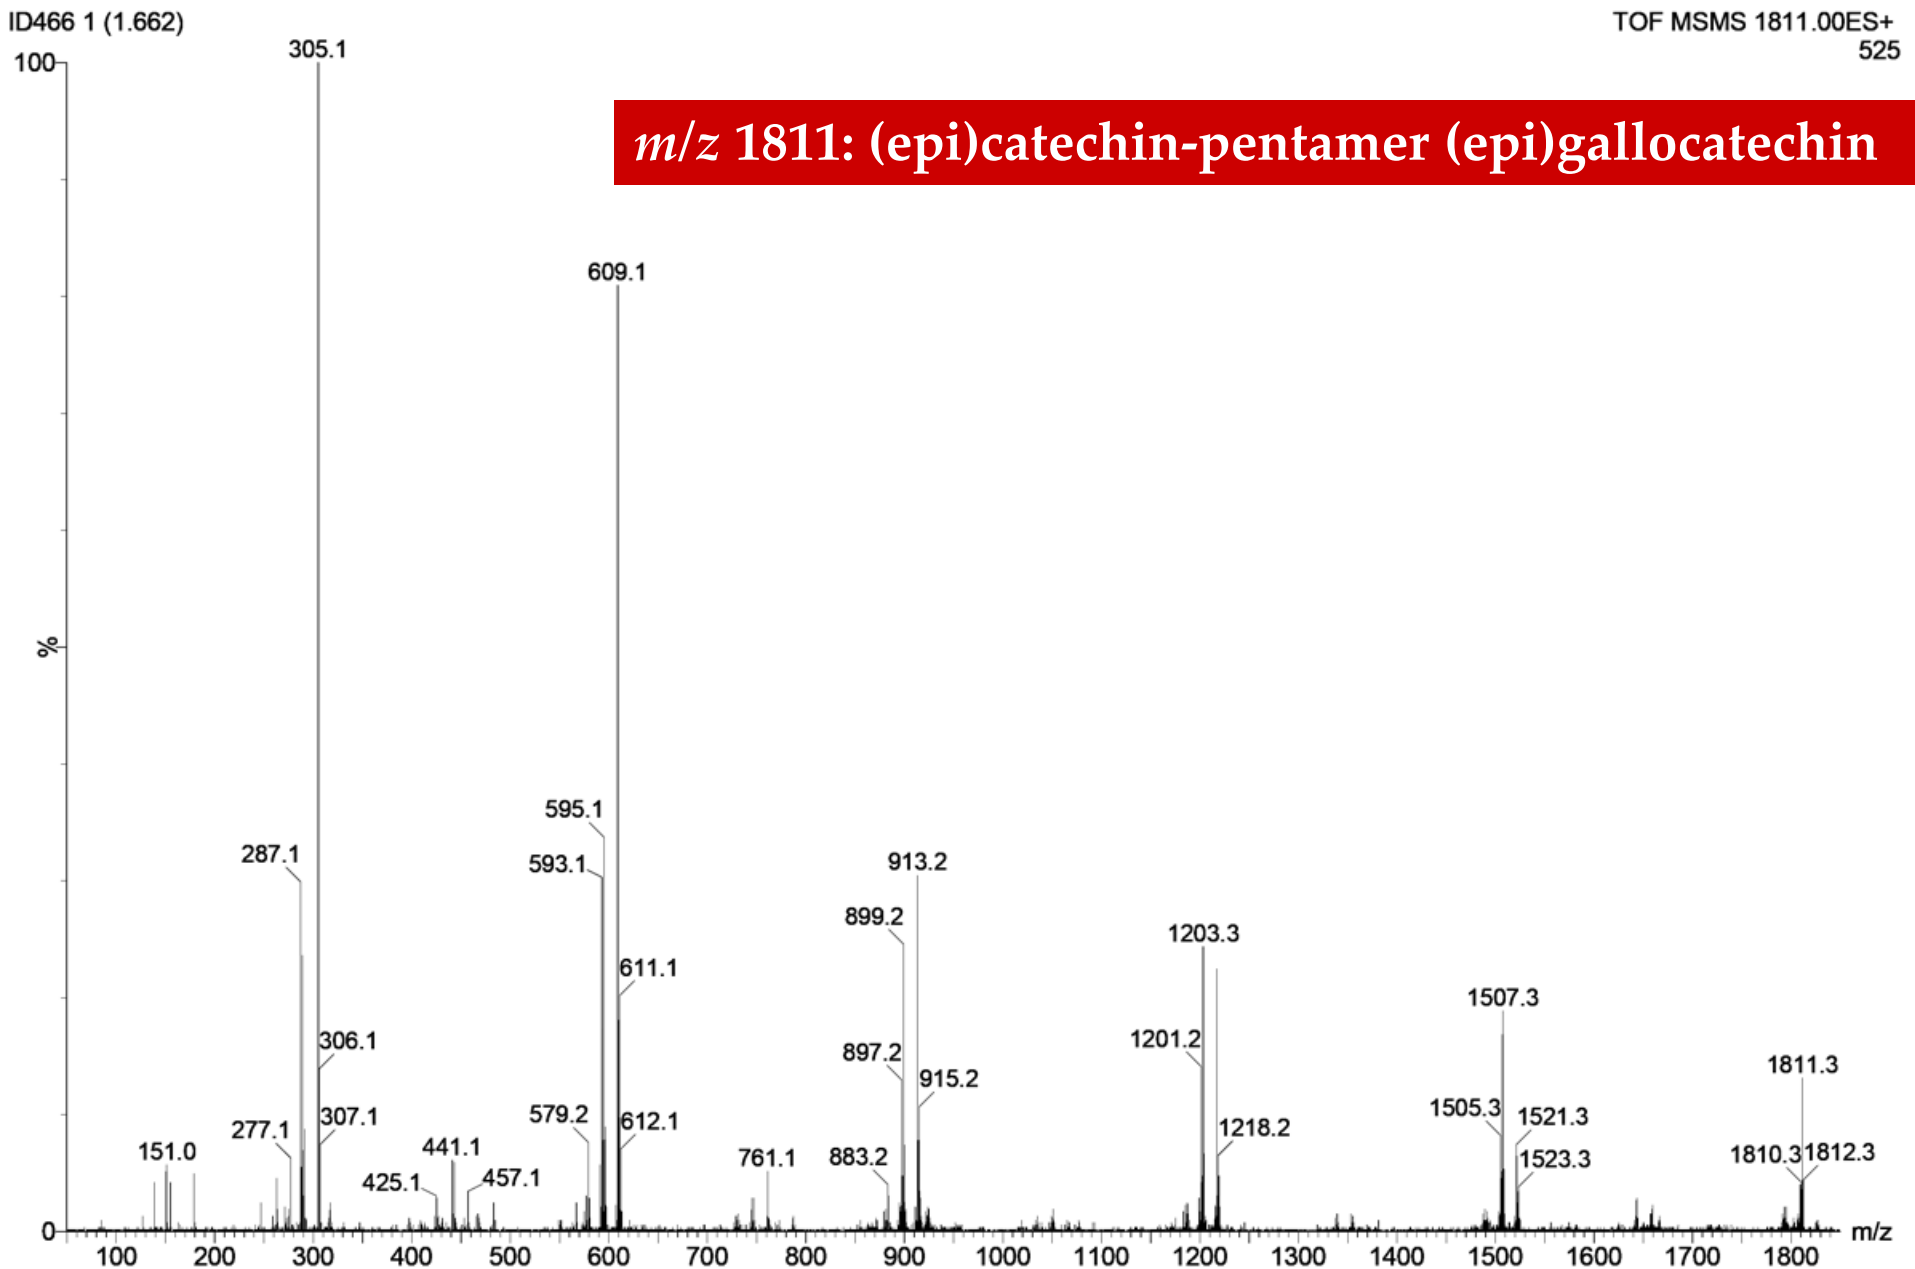

# Supplementary Materials

**Figure 18** - MALDI-TOF-MS in linear positive ion mode of wastewater samples from treatment with: A) tap water containing *L. pentosus*; B) tap water; C) recycled wastewater from a previous curing treatment with tap water.

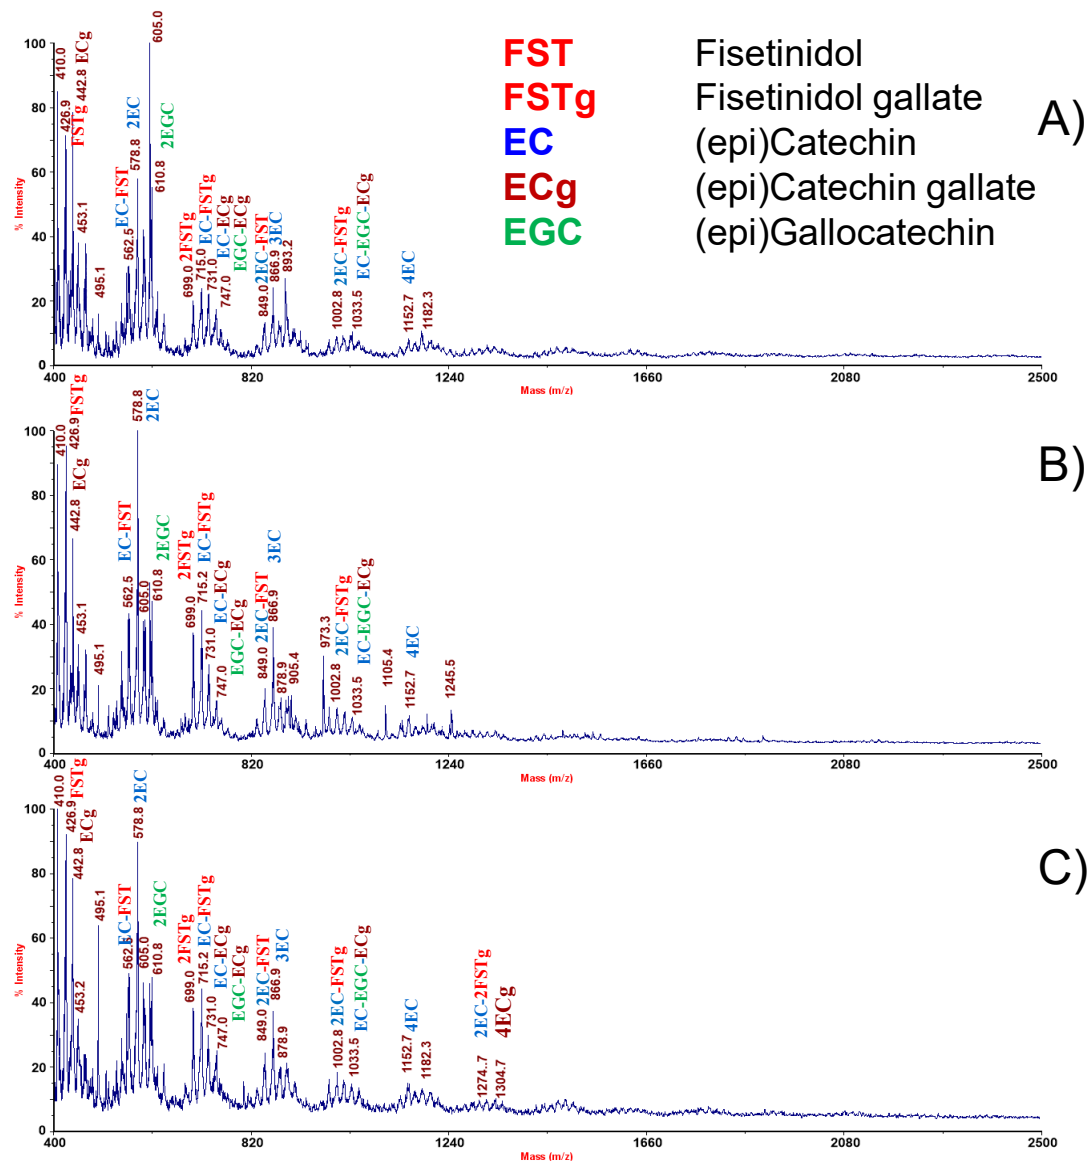

Supplement: s1 [file s1]
